1 **Reducing FASN expression sensitizes acute myeloid leukemia cells to**  
2 **differentiation therapy**

3 Magali Humbert<sup>1,2,#</sup>, Kristina Seiler<sup>1,3</sup>, Severin Mosimann<sup>1</sup>, Vreni Rentsch<sup>1</sup>, Sharon L.  
4 McKenna<sup>2,4</sup>, Mario P. Tschan<sup>1,2,3</sup>

5 <sup>1</sup>Institute of Pathology, Division of Experimental Pathology, University of Bern, Bern,  
6 Switzerland

7 <sup>2</sup>TRANSAUTOPHAGY: European network for multidisciplinary research and  
8 translation of autophagy knowledge, COST Action CA15138

9 <sup>3</sup>Graduate School for Cellular and Biomedical Sciences, University of Bern, Bern,  
10 Switzerland,

11 <sup>4</sup>Cancer Research, UCC, Western Gateway Building, University College Cork, Cork,  
12 Ireland.

13

14 #Corresponding Author: Magali Humbert, Institute of Pathology, Division of  
15 Experimental Pathology, University of Bern, Murtenstrasse 31, CH-3008 Bern,  
16 Switzerland, E-mail: magali.humbert@pathology.unibe.ch, Tel: +41 31 632 8744,  
17 Fax: +41 31 381 3412

18

19 Running Title: FASN impairs TFEB activity in AML

20 Key words: FASN/AML/ATRA/TFEB/mTOR/autophagy

21

22

23 **Abstract**

24 Fatty acid synthase (FASN) is the only human lipogenic enzyme available for *de*  
25 *novo* fatty acid synthesis and is often highly expressed in cancer cells. We found that  
26 FASN mRNA levels were significantly higher in acute myeloid leukemia (AML)  
27 patients than in healthy granulocytes or CD34<sup>+</sup> hematopoietic progenitors.  
28 Accordingly, FASN levels decreased during all-*trans* retinoic acid (ATRA)-mediated  
29 granulocytic differentiation of acute promyelocytic leukemia (APL) cells, partially via  
30 autophagic degradation. Furthermore, our data suggests that inhibition of FASN  
31 expression levels using RNAi or (-)-epigallocatechin-3-gallate (EGCG), accelerates  
32 the differentiation of APL cell lines and significantly re-sensitized ATRA refractory  
33 non-APL AML cells. FASN reduction promoted translocation of transcription factor EB  
34 (TFEB) to the nucleus, paralleled by activation of CLEAR network genes and  
35 lysosomal biogenesis. Lysosomal biogenesis was activated, consistent with TFEB  
36 transcriptional activation of CLEAR network genes.

37 Together, our data demonstrate that inhibition of FASN expression in combination  
38 with ATRA treatment facilitates granulocytic differentiation of APL cells and may  
39 extend differentiation therapy to non-APL AML cells.

40

## 41 **Introduction**

42 While traditional chemotherapy and radiotherapy target highly proliferative cancer  
43 cells, differentiation-inducing therapy aims to restore differentiation programs to drive  
44 cancer cells into maturation and ultimately into cell death. Differentiation therapies  
45 are associated with lower toxicity compared to classical cytotoxic therapies. The  
46 success of this therapeutic approach is exemplified by the introduction of all-*trans*  
47 retinoic acid (ATRA) in 1985 to treat acute promyelocytic leukemia (APL) (Wang &  
48 Chen, 2008). The introduction of ATRA into the treatment regimen changed APL from  
49 being one of the most aggressive acute myeloid leukemia (AML) subtypes with a fatal  
50 course often within weeks only, to a curable disease with a complete remission rate  
51 of up to 95% when combined with anthracycline-based chemotherapy or arsenic  
52 trioxide (Wang & Chen, 2008). APL is characterized by translocations involving the  
53 C-terminus of the retinoic acid receptor alpha (RARA) on chromosome 17 and genes  
54 encoding for aggregate prone proteins. Promyelocytic leukemia (PML)-RARA is the  
55 most frequently expressed fusion protein. It is encoded by the translocation t(15;17)  
56 and has a dominant negative effect on RARA. RARA transcriptionally regulates  
57 multiple biological processes with a key role in differentiation (Germain *et al*, 2006).  
58 Several reports suggest a beneficial effect of ATRA in combination therapies in non-  
59 APL AML cells (Su *et al*, 2015; Marchwicka *et al*, 2014; Schenk *et al*, 2012).  
60 Unfortunately, a variety of intrinsic resistance mechanisms in non-APL AML have  
61 been identified such as SCL overexpression, expression of PRAME and epigenetic  
62 silencing or mutation of RARA (Rice *et al*, 2004; Bullinger *et al*, 2013; Petrie *et al*,  
63 2009; Altucci & Gronemeyer, 2001). Deciphering the mechanisms active during  
64 ATRA-mediated differentiation at the molecular level will support the translation of  
65 differentiation therapy to non-APL AML patients. We and others have demonstrated  
66 the importance of autophagy in ATRA induced granulocytic differentiation of APL

67 cells (Isakson *et al*, 2010; Wang *et al*, 2011; Jin *et al*, 2018; Humbert *et al*, 2017;  
68 Brigger *et al*, 2014b; Orfali *et al*, 2019). Autophagy is an intracellular degradation  
69 mechanism that ensures dynamic recycling of various cytoplasmic contents (Feng *et*  
70 *al*, 2014). We thus aim to understand the role of autophagy in granulocytic  
71 differentiation and to define key druggable autophagy targets in this process.

72 Endogenous synthesis of fatty acids is catalyzed by fatty acid synthase (FASN), the  
73 only human lipogenic enzyme able to perform *de novo* synthesis of fatty acids  
74 (Asturias *et al*, 2005; Maier *et al*, 2006). FASN is frequently overexpressed in a  
75 variety of tumor types including leukemias (Pizer *et al*, 1998; Visca *et al*, 2004;  
76 Bandyopadhyay *et al*, 2005; Alo *et al*, 1996; Shurbaji *et al*, 1996; Rashid *et al*, 1997;  
77 Diaz-Blanco *et al*, 2007) while its expression in healthy adult tissues is low (Weiss *et*  
78 *al*, 1986), with the exception of the cycling endometrium (Pizer *et al*, 1997) and  
79 lactating breast (Maningat *et al*, 2009). Interestingly, FASN is upregulated in tumor  
80 associated myeloid cells where it activates nuclear receptor peroxisome-proliferator-  
81 activated receptor beta/delta (PPAR $\beta/\delta$ ) (Park *et al*, 2015), a key metabolic  
82 transcription factor in tumorigenesis (Peters & Gonzalez, 2009; Zuo *et al*, 2009). Of  
83 note, activation of PPAR $\beta/\delta$  regulates anti-inflammatory phenotypes of myeloid cells  
84 in other biological contexts such as atherosclerosis and obesity (Han Jung-Kyu *et al*,  
85 2008; Kang *et al*, 2008; Lee *et al*, 2003; Odegaard *et al*, 2008). We previously  
86 reported that (-)-epigallocatechin-3-gallate (EGCG) improved ATRA induced  
87 differentiation of APL cells by increasing the expression of death associated protein  
88 kinase 2 (DAPK2). Furthermore, EGCG treatment reduce FASN expression levels in  
89 selected breast cancer cell lines (Yeh *et al*, 2003). The increased FASN expression  
90 in cancer including leukemias, its function in tumor-associated myeloid cells and its

91 link to the differentiation enhancer DAPK2 prompted us to analyze the regulation and  
92 function of FASN during myeloid leukemic differentiation.

93 In the present study, we demonstrate that FASN expression is significantly higher in  
94 AML blasts partially due to low autophagic activity in those cells. We show that  
95 inhibiting FASN protein expression, but not its enzymatic activity, promotes  
96 differentiation of non-APL AML cells. Lastly, we link FASN expression to mTOR  
97 activation and inhibition of the key lysosomal biogenesis transcription factor TFEB.

98

## 99 **Material and Methods**

### 100 *2.1. Primary cells, cell lines and culture conditions*

101 Fresh leukemic blast cells from untreated AML patients at diagnosis were obtained  
102 from the Inselspital Bern (Switzerland) were classified according to the French-  
103 American-British classification and cytogenetic analysis. All leukemia samples had  
104 blast counts of ~90% after separation of mononuclear cells using a Ficoll gradient  
105 (Lymphoprep; Axon Lab AG, Switzerland), as described previously (Tschan *et al*,  
106 2003). Protocols and use of 67 human samples acquired in Bern were approved by  
107 the Cantonal Ethical Committee at the Inselspital. The isolation of primary neutrophils  
108 (purity 95%) was performed by separating blood cells from healthy donors using  
109 polymorphprep (Axon Lab AG, Switzerland). CD34<sup>+</sup> cells from cord blood or bone  
110 marrow were isolated as described (Tschan *et al*, 2003).

111 The human AML cell lines, HT93, OCI/AML2, MOLM-13 and NB4 were obtained from  
112 the Deutsche Sammlung von Mikroorganismen und Zellkulturen GmbH (DSMZ,  
113 Braunschweig, Germany). All cell lines were maintained in RPMI-1640 with 10% fetal  
114 calf serum (FCS), 50 U/mL penicillin and 50 µg/mL streptomycin in a 5% CO<sub>2</sub>-95%  
115 air humidified atmosphere at 37°C. For differentiation experiments, AML cells were  
116 treated with 1µM all-*trans* retinoic acid (ATRA; Sigma-Aldrich, Switzerland).  
117 Successful granulocyte differentiation was evidenced by CD11b surface expression  
118 measured by FACS.

119 293T cells were maintained in DMEM (Sigma-Aldrich, St. Louis, MO, USA),  
120 supplemented with 5% FBS, 1% penicillin/streptomycin, and 1% Heparin (Sigma-  
121 Aldrich, Switzerland), and kept in a 7.5%CO<sub>2</sub>-95% air humidified atmosphere at  
122 37°C.

### 123 *2.2 Antibodies*

124 Antibodies used were anti-FASN (3180; Cell Signaling, Switzerland), anti-LC3B (WB:  
125 NB600-1384, Novus biological, Switzerland; IF: 3868; Cell Signaling, Switzerland)  
126 anti-LAMP1 (14-1079-80; Thermofisher, Switzerland), anti-p62 (HPA003196 ; Sigma-  
127 Aldrich, Switzerland), anti-TFEB (4240; Cell Signaling, Switzerland) anti-ULK1(4776;  
128 Cell Signaling, Switzerland), anti p-ULK1 (Ser757) (6888; Cell Signaling,  
129 Switzerland), anti-ATG13 (6940 ; Cell Signaling, Switzerland), anti-pATG13 (Ser318)  
130 (600-401-C49; Rockland, Switzerland), anti p-mTOR (Ser2448) (5536; Cell Signaling,  
131 Switzerland), p4E-BP1 (Thr37/46) (2855; Cell Signaling, Switzerland), anti- $\alpha$ -tubulin  
132 (3873; Cell Signaling, Switzerland), anti-cleaved PARP (9541; Cell Signaling,  
133 Switzerland), anti  $\gamma$ H2AX (2577; Cell Signaling, Switzerland) and anti-CD11b-PE  
134 (R0841; Dako, Switzerland).

### 135 *2.3 Cell lysate preparation and western blotting*

136 Whole cell extracts were prepared using UREA lysis buffer and 30-60 $\mu$ g of total  
137 protein was loaded on a 7.5% or 12% denaturing polyacrylamide self-cast gel (Bio-  
138 Rad, Switzerland). Blots were incubated with the primary antibodies in TBS 0.05%  
139 Tween-20 / 5% milk overnight at 4°C and subsequently incubated with HRP coupled  
140 secondary goat anti-rabbit (7074; Cell Signaling, Switzerland) and goat anti-mouse  
141 antibody (7076; Cell Signaling, Switzerland) at 1:5-10,000 for 1 h at room  
142 temperature. Blots were imaged using Chemidoc (Bio-Rad, Switzerland) and  
143 ImageLab software.

### 144 *2.4 Lentiviral vectors*

145 pLKO.1-puro lentiviral vectors expressing shRNAs targeting *FASN* (sh*FASN*\_1:  
146 NM\_004104.x-1753s1c1 and sh*FASN*\_2: NM\_004104.x-3120s1c1) were purchased  
147 from Sigma-Aldrich. An mCherry-LC3B lentiviral vector was kindly provided by Dr.  
148 Maria S. Soengas (CNIO, Molecular Pathology Program, Madrid, Spain). All vectors

149 contain a puromycin antibiotic resistance gene for selection of transduced  
150 mammalian cells. Lentivirus production and transduction were done as described  
151 (Rizzi *et al*, 2007; Tschan *et al*, 2003). Transduced NB4 cell populations were  
152 selected with 1.5 µg/ml puromycin for 4 days and knockdown efficiency was  
153 assessed by western blot analysis.

#### 154 *2.5 Immunofluorescence microscopy*

155 Cells were prepared as previously described (Brigger *et al*, 2014b). Briefly, cells were  
156 fixed and permeabilized with ice-cold 100% methanol for 4 min (LC3B and LAMP1  
157 staining) or 2% paraformaldehyde for 7 min followed by 5 minutes in PBS 0,1%  
158 TRITON X-100 (TFEB and tubulin staining) and then washed with PBS. Cells were  
159 incubated with primary antibody for 1 h at room temperature followed by washing  
160 steps with PBS containing 0.1% Tween (PBS-T). Cells were incubated with the  
161 secondary antibody (anti-rabbit, 111-605-003 (Alexa Fluor® 647) 111-096-045  
162 (FITC); anti-mouse, (Cy3) 115-605-003 (Alexa Fluor® 647); Jackson  
163 ImmunoResearch, West Grove, PA, USA) for 1 h at room temperature. Prior to  
164 mounting in fluorescence mounting medium (S3032; Dako, Switzerland) cells were  
165 washed three times with PBS-Tween. Images were acquired on an Olympus  
166 FluoView-1000 confocal microscope (Olympus, Volketswil, Switzerland) at 63x  
167 magnification.

#### 168 *2.6 Acridine Orange staining*

169 Cells were washed 3 times with PBS and resuspended in RPMI 10% FBS containing  
170 5µg/mL Acridine Orange (A3568, Invitrogen, Switzerland) to a concentration of 0.2 x  
171 10<sup>6</sup> cells per mL. Cells were then incubated at 37°C for 20 min and washed 3 times  
172 with PBS. Acridine Orange staining was measured by FACS analysis using a 488nm



173 laser with 530/30 (GREEN) and 695/40 (RED) filters on a FACS LSR-II (BD  
174 Biosciences, Switzerland). Data were analyzed with FlowJo software (Ashland, OR,  
175 USA). The software derived the RED/GREEN ratio and we compared the distribution  
176 of populations using the Overton cumulative histogram subtraction algorithm to  
177 provide the percentage of cells more positive than the control.

## 178 2.7 Nitroblue tetrazolium reduction test

179 Suspension cells ( $5 \times 10^5$ ) were resuspended in a 0.2% nitro blue tetrazolium (NBT)  
180 solution containing 40ng/ml PMA and incubated 15min at 37°C. Cells were then  
181 washed with PBS and subjected to cytopsin. Counterstaining was done with 0.5%  
182 Safranin O for 5min (HT90432; Sigma Aldrich, Switzerland). The NBT-positive and  
183 negative cells were scored under a light microscope (EVOS XL Core, Thermofisher,  
184 Switzerland).

## 185 2.8 Trypan blue exclusion counting

186 Trypan blue exclusion cell counting was performed to assess cellular growth. 20 $\mu$ L of  
187 cell suspension was incubated with an equal volume of 0.4% (w/v) trypan blue  
188 solution (Sigma-Aldrich, Switzerland). Cells were counted using a dual-chamber  
189 hemocytometer and a light microscope (EVOS XL Core, Thermofisher, Switzerland).

## 190 2.9 Real-time quantitative RT-PCR (qPCR).

191 Total RNA was extracted using the RNeasy Mini Kit and the RNase-Free DNase Set  
192 according to the manufacturer's protocol (Sigma-Aldrich, Switzerland). Total RNA  
193 was reverse transcribed using all-in-one RT-PCR (BioTool, Switzerland). Taqman®  
194 Gene Expression Assays for *BECN1*, *GABARAP*, *STK4*, and *WDR45* were  
195 Hs00186838\_m1, Hs00925899\_g1, Hs00178979\_m1 and Hs01079049\_g1,

196 respectively. Specific primers and probes for *HMBS* have been already described  
197 (Tschan *et al*, 2003). Data represent the mean  $\pm$  s.d. of at least two independent  
198 experiments.

#### 199 *2.10 Statistical analysis*

200 Nonparametric Mann-Whitney-U tests were applied to compare the difference  
201 between two groups and Spearman Coefficient Correlation using Prism software  
202 (GraphPad Software, Inc., Jolla, CA, USA). P-values < 0.05 were considered  
203 statistically significant. The error bar on graphs represents the SD of at least two  
204 biological replicates performed in two technical replicates

205 **3.1. Primary AML blast cells express significantly higher FASN levels**  
206 **compared to mature granulocytes**

207 Cancer cells frequently express high levels of FASN compared to their healthy  
208 counterparts (Pizer *et al*, 1998; Visca *et al*, 2004; Bandyopadhyay *et al*, 2005; Alo *et*  
209 *al*, 1996; Shurbaji *et al*, 1996; Rashid *et al*, 1997; Diaz-Blanco *et al*, 2007). We  
210 examined *FASN* mRNA expression in an AML patient cohort. *FASN* mRNA levels in  
211 AML samples (n=68) were compared to the levels in granulocytes (n=5) and CD34<sup>+</sup>  
212 human hematopoietic progenitor cells (n=3) from healthy donors. We found that  
213 *FASN* expression was significantly higher in AML patients compared to healthy  
214 granulocytes (p<0.05) (Figure 1A). We obtained similar findings by analyzing *FASN*  
215 expression in AML patient data available from the Bloodspot gene expression profile  
216 data base (Bagger *et al*, 2016) (Figure 1B). In addition, hematopoietic stem cells from  
217 healthy donors express significantly lower *FASN* mRNA transcript levels than AML  
218 blasts (Figure 1B). Next, we asked if *FASN* expression was altered during  
219 granulocytic differentiation of APL cells. We analyzed *FASN* protein expression  
220 following ATRA-induced differentiation of two APL cell lines, NB4 and HT93. ATRA  
221 treatment resulted in markedly reduced *FASN* protein levels from day two onwards  
222 (Figure 1C). This further suggests that high *FASN* expression is linked to an  
223 immature blast-like phenotype and that ATRA-induced differentiation reduces *FASN*  
224 levels.

225 **3.2. FASN protein is degraded via macroautophagy during ATRA-induced**  
226 **granulocytic differentiation**

227 We and others have demonstrated that autophagy gene expression is repressed in  
228 AML samples compared to granulocytes from healthy donors and that autophagy  
229 activity is essential for successful ATRA-induced APL differentiation (Isakson *et al*,

230 2010; Wang *et al*, 2011; Jin *et al*, 2018; Humbert *et al*, 2017; Brigger *et al*, 2014b;  
231 Watson *et al*, 2015; Orfali *et al*, 2015, 2019). The decrease in FASN expression upon  
232 ATRA-induced differentiation cannot be explained solely by transcriptional regulation  
233 due to the long half-life of this protein (1-3 days)(Volpe & Vagelos, 1976; Weiss *et al*,  
234 1986). Moreover, FASN can be present inside autophagosomes, for instance in yeast  
235 and in the breast cancer cell line MCF7 (Dengjel *et al*, 2012; Suzuki *et al*, 2014).  
236 Therefore, we hypothesized that ATRA-induced autophagy participates in the  
237 degradation of FASN during differentiation of APL cells. To examine whether  
238 autophagy is involved in FASN degradation, we treated NB4 cells for 24h with  
239 different concentrations of Bafilomycin A1 (BafA1), a specific inhibitor of vacuolar-  
240 type H<sup>+</sup>-ATPase (Yamamoto *et al*, 1998; Poole & Ohkuma, 1981), alone or in  
241 combination with ATRA. FASN protein was found to accumulate in the presence of  
242 BafA1, together with autophagy markers p62 and LC3B-II (Figure 2A). To validate  
243 these findings, we utilized NB4 cells stably expressing mCherry-LC3B. Cells were  
244 treated with different concentrations of BafA1 with or without ATRA for 24h and  
245 FASN as well as LC3B localization was assessed. Endogenous FASN (cyan) showed  
246 co-localization with mCherry-LC3B (red) in BafA1 and ATRA treated cells (Figure  
247 2B). In addition, we found colocalization with endogenous FASN (red) and p62  
248 (green) in NB4 parental cells treated with both ATRA and BafA1 for 24h (Figure 2C).  
249 It is possible that p62 may help to sequester FASN to the autophagosome. In  
250 summary, these data suggest that FASN is a target for autophagic degradation  
251 during granulocytic differentiation of APL cells.

252 We have previously shown that EGCG improves the response to ATRA in AML cells  
253 by inducing DAPK2 expression, a key kinase in granulocytic differentiation (Britschgi  
254 *et al*, 2010). Furthermore, EGCG was reported to decrease FASN expression (Yeh *et*  
255 *al*, 2003) and this was reproducible in our APL cell line model (Supplementary Figure

256 1A-B). Using different EGCG doses and treatment time points, we confirmed that  
257 EGCG improves ATRA induced differentiation in NB4 cells, as evidenced by  
258 increased NBT positive cells and CD11b surface expression (Supplementary Figure  
259 1C-E). Importantly, increased differentiation when combining ATRA with EGCG was  
260 paralleled by enhanced autophagic activity (Supplementary Figure 1F-G). Autophagy  
261 induction was determined by quantifying endogenous, lipidated LC3B-II by western  
262 blotting and a dual-tagged mCherry-GFP-LC3B expression construct as described  
263 previously (Humbert *et al*, 2017; Gump & Thorburn, 2014; Klionsky *et al*, 2016).  
264 Autophagic flux quantification upon EGCG treatment was performed in the presence  
265 or absence of BafA1 (Klionsky *et al*, 2016). We found no significant changes in cell  
266 death or proliferation measured by DAPI staining and trypan blue exclusion,  
267 respectively (Supplementary Figure 2H-I). Co-treating NB4 parental cells with EGCG  
268 and ATRA as well as blocking autophagy using BafA1 for 24h, resulted in a higher  
269 accumulation of FASN protein (Figure 2D and Supplementary Figure 1J).  
270 Interestingly, we saw an accumulation of a band at the molecular weight of FASN  
271 dimer (Figure 2D and Supplementary Figure 1J). Together, our data demonstrate that  
272 FASN can be degraded via autophagy during APL cell differentiation and that co-  
273 treatment with EGCG further promotes FASN protein degradation.

### 274 **3.4. Inhibiting FASN protein expression but not its catalytic function** 275 **accelerates ATRA-induced granulocytic differentiation in APL cell lines**

276 Next, we evaluated the impact of modulating FASN expression and activity on  
277 myeloid differentiation. Therefore, we genetically inhibited FASN expression using  
278 lentiviral vectors expressing two independent shRNAs targeting *FASN* in the NB4  
279 APL cell line model. Knockdown efficiency was validated by western blotting (Figure  
280 3A). We found that ATRA treatment significantly reduced the doubling time

281 (Supplementary Figure 2A-B) and lowered accumulation of DNA damage as  
282 indicated by  $\gamma$ H2AX immunofluorescence staining in NB4 *FASN* depleted cells  
283 (Supplementary Figure 2C-D). Of note, at steady state conditions, knocking down  
284 *FASN* did not affect proliferation compared to control cells. Knocking down *FASN* in  
285 NB4 cells resulted in accelerated differentiation into functional granulocytes  
286 compared to the control cells as shown by NBT assays (Figure 3B-C) and by CD11b  
287 surface expression analysis (Figure 3D). We then assessed the effects of two  
288 pharmacological *FASN* inhibitors, C75 and Orlistat. We used C75 and Orlistat  
289 concentrations that do not induce significant cell death (Supplementary Figure 3A-B)  
290 or decrease proliferation (Supplementary figure 3C-D) to avoid non-specific effects.  
291 Of note, *FASN* protein levels in APL cells were not reduced by C75 or Orlistat  
292 treatment (Supplementary Figure 3E-F). Unexpectedly, co-treatment of NB4 cells  
293 with ATRA and C75 (Figure 3E-G) or Orlistat (Figure 3H-J) did not reproduce the  
294 phenotype of the *FASN* knockdown cells. Indeed, cells were differentiating similarly  
295 or less compared to control treated cells as demonstrated by NBT assays (Figure 3E-  
296 F and Figure 3H-I) and CD11b surface expression (Figure 3G and Figure 3).  
297 Therefore, we conclude that the catalytic activity of *FASN* is not involved in impeding  
298 ATRA-mediated differentiation in NB4 cells.

### 299 **3.5. *FASN* attenuates autophagy by increasing mTOR activity**

300 *FASN* has been previously reported to promote carcinogenesis by activating mTOR,  
301 a master negative regulator of autophagy, via AKT signaling in hepatocellular  
302 carcinoma (Hu *et al*, 2016; Calvisi *et al*, 2011). ATRA treatment in APL also reduces  
303 mTOR activity leading to autophagy activation (Isakson *et al*, 2010). We therefore  
304 hypothesized that *FASN* may negatively regulate autophagy via mTOR in APL cells,  
305 thereby impeding ATRA-induced differentiation. Therefore, we initially confirmed that  
306 *FASN* expression impacts autophagic activity in our system. Autophagy induction

307 was determined by quantifying endogenous LC3B dots formation by  
308 immunofluorescence microscopy (IF) after ATRA treatment (Klionsky *et al*, 2016). In  
309 order to measure autophagic flux, ATRA treatment was performed in the presence or  
310 absence of BafA1 (Figure 4A-B) (Klionsky *et al*, 2016). In addition, we looked at the  
311 direct consequences of mTOR activity in ULK1 and ATG13 phosphorylation. ULK1  
312 (ATG1), a key autophagy gene of the initiation complex, is inhibited by mTOR-  
313 mediated phosphorylation at Ser757, leading to reduced autophagic activity (Figure  
314 4C) (Kim *et al*, 2011). In line with FASN activating mTOR, lowering *FASN* expression  
315 by shRNA (Figure 4D) resulted in decreased mTOR phosphorylation at Ser2448  
316 (Figure 4E) and mTOR-mediated downstream phosphorylation of ULK1 at Ser757  
317 (Figure 4F). Elevated ULK1 activity was confirmed by an increase of ATG13  
318 activating phosphorylation at Ser318 (Figure 4G) (Joo *et al*, 2011; Petherick *et al*,  
319 2015). These results suggest that *FASN* expression promotes mTOR activity, which  
320 in turn enhances autophagy inhibition in AML cells.

### 321 **3.6. FASN expression negatively affects transcription factor EB (TFEB)** 322 **activation**

323 mTOR phosphorylates the transcription factor EB (TFEB), a master regulator of  
324 lysosome biogenesis, leading to the sequestration of TFEB within the cytoplasm and  
325 inhibition of its transcriptional activity (Vega-Rubin-de-Celis *et al*, 2017; Peña-Llopis  
326 *et al*, 2011; Roczniak-Ferguson *et al*, 2012; Napolitano *et al*, 2018). TFEB is a key  
327 transcriptional regulator of more than 500 genes that comprise the CLEAR  
328 (Coordinated Lysosomal Expression and Regulation) network of autophagy and  
329 lysosomal genes (Supplementary Figure 4A). A recent study demonstrated the key  
330 role of TFEB during ATRA induced differentiation (Orfali *et al*, 2019). We therefore  
331 investigated the relationship between *FASN* and CLEAR network gene expression.

332 Interestingly, the majority of the TFEB downstream targets from the different  
333 categories (lysosomal hydrolases and accessory proteins, lysosomal membrane,  
334 lysosomal acidification, non-lysosomal proteins involved in lysosomal biogenesis and  
335 autophagy) are negatively associated with FASN transcript levels in primary AML  
336 patient blasts from TCGA analyzed using the UCSC Xena platform (Goldman *et al*,  
337 2019) and the Blood spot gene expression profiles data base (Bagger *et al*, 2016)  
338 (Figure 5A, Supplementary Figures 4B-C Supplementary Table 1-2). Furthermore,  
339 analyzing RNA-seq data of NB4 cells treated with ATRA confirmed a reduction of  
340 FASN expression paralleled by increased TFEB and TFEB target gene transcript  
341 levels (Orfali *et al*, 2019) (Figure 5B). To test if the FASN-mTOR pathway is involved  
342 in regulating TFEB activity, we analyzed the cellular localization of TFEB upon ATRA  
343 treatment in NB4 control and FASN depleted cells. First, we investigated if TFEB  
344 translocates to the nucleus following ATRA treatment and if this translocation is  
345 paralleled by an increase in lysosome numbers (LAMP1<sup>+</sup> dots), assessed by  
346 immunofluorescence microscopy (Supplementary Figure 5A-B). Indeed, ATRA  
347 treatment resulted in increased LAMP1<sup>+</sup> dot formation and nuclear translocation of  
348 TFEB. Interestingly, TFEB nuclear translocation occurs faster in FASN depleted NB4  
349 cells compared to control cells (Figure 5C), consistent with an increase in LAMP1<sup>+</sup>  
350 dot formation (Figure 5D-E). Furthermore, we treated cells with Acridine Orange to  
351 quantify the lysosomal integrity by flow cytometry. Acridine Orange is a cell  
352 permeable fluorescent dye that, when excited at 488nm, emits light at 530nm  
353 (GREEN) in its monomeric form but shifts its emission to 680nm (RED) when  
354 accumulating and precipitating inside lysosomes. Therefore, we measured the  
355 RED/GREEN ratio of Acridine Orange stained cells by flow cytometry as previously  
356 described (Thomé *et al*, 2016). We found that ATRA treatment shifted the ratio  
357 towards the red channel (Supplementary Figure 5C). Reducing FASN expression



358 further accelerated the increase of RED/GREEN ratio indicating enhanced lysosome  
359 biogenesis (Figure 5G-H). These results suggest that FASN expression impairs  
360 TFEB translocation to the nucleus and therefore reduces lysosome biogenesis

361 We then evaluated the effect of FASN expression on the transcription of the following  
362 TFEB target genes: *BECN1*, *GABARAP*, *STK4* and *WDR45*. All 4 TFEB targets  
363 showed increased expression upon ATRA treatment, in line with previous studies  
364 (Orfali *et al*, 2015; Brigger *et al*, 2013, 2014a) (Figure 5I). Knock down of *FASN* led  
365 to a further increase in the expression of 3/4 TFEB targets analyzed (Figure 5I).  
366 These results suggest that FASN retardation of TFEB translocation to the nucleus  
367 attenuates CLEAR network gene transcription.

368 Then, we tested whether we can obtain similar results by lowering FASN protein  
369 levels using EGCG. Using different EGCG concentrations, we found a decrease in  
370 mTOR phosphorylation at Ser2448 (Figure 6A), an increase of TFEB translocation to  
371 the nucleus (Figure 6B), an increase of LAMP1<sup>+</sup> vesicles (Supplementary Figure 6A-  
372 B) and an increase of the RED/GREEN ratio in Acridine Orange stained cells similar  
373 to the results seen in FASN-depleted APL cells (Supplementary Figure 6C-E). In  
374 addition, we found an upregulation of 3/4 TFEB target genes in presence of EGCG in  
375 line with our FASN knockdown experiments (Figure 6C).

376 Together, these data suggest that high FASN expression results in lower autophagic  
377 activity and decreased lysosomal capacity due to increased mTOR activity causing  
378 TFEB inhibition.

379 **3.7. Lowering FASN expression improves ATRA therapy in non-APL AML cell**  
380 **lines by inhibiting the mTOR pathway**

381 Given the fact that APL cells treated with EGCG demonstrated improved response to  
382 ATRA therapy, we asked if EGCG can be beneficial to other AML subtypes that are  
383 refractory to ATRA treatment. We and others previously demonstrated a positive  
384 impact of co-treating HL60 AML cells, a non-APL AML cell line that responds to  
385 ATRA, with EGCG and ATRA (Britschgi *et al*, 2010; Moradzadeh *et al*, 2018; Lung *et*  
386 *al*, 2002). Therefore, we tested if ATRA-refractory AML cell lines with different genetic  
387 backgrounds, namely MOLM-13 (FLT3-ITD<sup>+</sup>) and OCI/AML2 (DNMT3A R635W  
388 mutation), would respond to ATRA in combination with EGCG. Both cell lines showed  
389 increased granulocytic differentiation upon the combination treatment as shown by  
390 CD11b surface expression (Figure 7A-B). In addition, MOLM-13 and OCI/AML2  
391 showed an increase of RED/GREEN ratio when stained with Acridine Orange (Figure  
392 7C-D). Furthermore, co-treatment with ATRA and EGCG led to a decrease in mTOR  
393 activity as seen by a decrease in mTOR (Ser2448) and ULK1 (Ser757)  
394 phosphorylation. In MOLM-13, it was paralleled by an increase of ATG13 (Ser318)  
395 phosphorylation (Figure 7E-F). We further confirmed these data by genetically  
396 inhibiting *FASN* in MOLM-13 (Figure 8A) and OCI/AML2 (Figure 8B) cells. Depleting  
397 *FASN* in both cell lines caused an increase of CD11b surface expression after 3 days  
398 of ATRA treatment (Figure 8C-D), coupled with an increased RED/GREEN ratio  
399 when stained for Acridine Orange (Figure 8E-F) and lower mTOR activity (Figure 8G-  
400 H). Interestingly, we found more variation in lysosomal compartment changes  
401 between the experimental duplicates upon ATRA when cells were treated with EGCG  
402 (Figure 7D and 7F) than in the knockdown cells (Figures 8F and 8H), perhaps  
403 reflecting the lower specificity of EGCG.

404 Together, our data suggest that reducing *FASN* expression can increase lysosomal  
405 biogenesis and improve the differentiation of non-APL AML cells.

## 406 Discussion

407 In this study, we aimed at further dissecting the function of fatty acid synthase in AML  
408 cells and, in particular, its potential role in the differentiation of immature AML blasts.  
409 We showed that knocking down *FASN* accelerated ATRA-induced differentiation,  
410 while inhibition of its enzymatic function by pharmacological inhibitors such as C75 or  
411 Orlistat had no effect. Furthermore, we found that *FASN* expression activates mTOR  
412 resulting in sequestration of TFEB to the cytoplasm. Importantly, inhibiting *FASN*  
413 expression, in combination with ATRA treatment, improved differentiation therapy in  
414 non-APL AML cells.

415 Several studies demonstrated a tumor suppressor role of autophagy in AML cells.  
416 Autophagy can support degradation of leukemic oncogenes in AML such as FLT3-  
417 ITD and PML-RARA (Larrue *et al*, 2016; Rudat *et al*, 2018; Isakson *et al*, 2010).  
418 Furthermore, activation of mTORC1 is crucial for leukemia cell proliferation at least  
419 partially due to its inhibitory effect on autophagy (Hoshii *et al*, 2012; Watson *et al*,  
420 2015). Accordingly, inhibition of autophagy leads to acceleration of MLL-ENL AML  
421 leukemia progression *in vivo* (Watson *et al*, 2015). Our results indicate that increased  
422 *FASN* expression might be a key activator of mTORC1 in AML. Surprisingly, we  
423 found that reducing *FASN* protein levels, but not inhibition of catalytic function,  
424 promotes ATRA-induced differentiation. Recently, Bueno *et al*. demonstrated that  
425 *FASN* is key during the transformation from 2- to 3-dimensional growth of cancer  
426 cells. This transformation step does not depend on the *FASN* biosynthetic products  
427 palmitate, further hinting to important non-catalytic functions of *FASN* in  
428 carcinogenesis (Bueno *et al*, 2019). Further studies on the interplay between *FASN*,  
429 mTOR and autophagy in AML transformation, progression and therapy resistance are

430 warranted to improve our understanding of cell fate decisions and could potentially  
431 open new avenues to tackle this disease with improved differentiation therapies.

432 We further confirmed that EGCG positively impacts on cellular differentiation in  
433 additional AML subtypes *in vitro* (Britschgi *et al*, 2010; Moradzadeh *et al*, 2018; Lung  
434 *et al*, 2002). Searching for potential mediators of the positive effects of EGCG  
435 observed during ATRA-induced differentiation, we previously found that EGCG  
436 induces expression of the Ca<sup>2+</sup>/calmodulin-regulated serine/threonine kinase DAPK2.  
437 DAPK2 plays a major role in granulocytic differentiation and decreased DAPK2  
438 expression in APL cells can be restored by ATRA and EGCG treatment (Rizzi *et al*,  
439 2007; Britschgi *et al*, 2010; Humbert *et al*, 2017). DAPK2 also negatively regulates  
440 mTOR via phosphorylation of raptor at Ser721 as shown in HeLa cells (Ber *et al*,  
441 2015). Therefore, a potential impact of FASN on DAPK2 activity in a leukemic context  
442 warrants further investigation.

443 Interestingly, treating APL cells with ATRA had a negative effect on FASN protein  
444 levels (Figure 1C), and we demonstrated that ATRA-induced autophagy contributes  
445 to FASN protein degradation. Furthermore, FASN reduction led to increased  
446 lysosomal biogenesis suggesting a negative feedback loop between autophagy and  
447 FASN. It is reasonable to hypothesize that the more AML cells differentiate the more  
448 they become competent to degrade long-lived proteins including FASN. In addition,  
449 inhibiting mTOR using Rapamycin or Everolimus accelerates differentiation of APL  
450 cells (Jin *et al*, 2018; Isakson *et al*, 2010). While PI3K/AKT/mTOR pathways are  
451 activated in about 80% of AML cases, mTOR inhibitors had only modest effects in  
452 AML therapy (Mirabilii *et al*, 2018; Tabe *et al*, 2017). Furthermore, despite its role in  
453 leukemia cells, mTOR activity is crucial for hematopoietic stem cell (HSC)  
454 proliferation and self-renewal potential (Ghosh & Kapur, 2016). Therefore, targeting

455 FASN with low expression in healthy progenitor cells would allow activation of  
456 autophagy in AML cells sparing healthy HSC cells in the bone marrow. In our hands,  
457 EGCG treatment only demonstrated partial effects regarding improved differentiation  
458 when compared to knocking down FASN in non-APL AML cells. Therefore, a more  
459 specific FASN expression inhibitor is needed to improve differentiation therapy in  
460 non-APL AML patients.

461 Indeed, it would be of interest to study the transcriptional regulation of FASN to  
462 influence its expression in autophagy deficient cells. Consistently, there are several  
463 studies showing that *FASN* transcription is positively affected by retinoic acids (Roder  
464 *et al*, 1996; Roder & Schweizer, 2007). However, transcription induction is not  
465 mediated by a classic retinoic acid responsive element (RARE) but rather by indirect  
466 influence of retinoic acid via *cis*-regulatory elements. Since this involves different  
467 cofactors it is tempting to speculate that transcriptional activation might switch to  
468 repression depending on the cellular context including specific retinoid-binding  
469 proteins and cofactors. We previously found that members of the KLF transcription  
470 factor family are often deregulated in primary AML patient samples. Among the  
471 different KLF family members downregulated in AML, particularly *KLF5* turned out to  
472 be essential for granulocytic differentiation (Humbert *et al*, 2011; Diakiw *et al*, 2012;  
473 Li *et al*, 2019). *KLF5* forms a transcriptionally active complex with RAR/RXR  
474 heterodimers (Lv *et al*, 2013; Kada *et al*, 2008). Interestingly, ectopic expression of  
475 *KLF5* in U937 non-APL AML cell line was sufficient to significantly increase ATRA-  
476 induced differentiation (Shahrin *et al*, 2016). We hypothesize that *KLF5* negatively  
477 regulates *FASN* transcription in AML cells via the RAR/RXR complex.

478 In summary, our data suggest that inducing FASN protein degradation is likely to be  
479 beneficial for differentiation therapy of non-APL AML cells as this will impede mTOR

480 and promote TFEB transcriptional activity and autophagy. Furthermore, high FASN  
481 expression in AML is partially based on attenuated autophagy activity in this disease.

482

### 483 **Acknowledgments**

484 Deborah Shan-Krauer is gratefully acknowledged for excellent technical support. We  
485 thank Dr. MS Soengas for providing a mCherry-LC3B lentiviral vector. This study was  
486 supported by grants from Swiss Cancer Research (KFS-3409-02-2014 to MPT, MD-  
487 PhD 03/17 Scholarship to KS), the Swiss National Science Foundation  
488 (31003A\_173219 to MPT), the Berne University Research Foundation (45/2018, to  
489 MPT), the University of Bern initiator grant, the Bernese Cancer League, “Stiftung für  
490 klinisch-experimentelle Tumorforschung”, and the Werner and Hedy Berger-Janser  
491 Foundation for Cancer Research (to MH). SMCK is supported by Breakthrough  
492 Cancer Research.

### 493 **Author Contribution**

494 MH, KS, SM, and VR performed the experimental research. MH, KS, SMCK and  
495 MPT drafted the article. MH designed the project. MPT gave final approval of the  
496 submitted manuscript.

### 497 **Conflict of interest**

498 None

### 499 **References**

500 Alo PL, Visca P, Marci A, Mangoni A, Botti C & Di Tondo U (1996) Expression of fatty  
501 acid synthase (FAS) as a predictor of recurrence in stage I breast carcinoma  
502 patients. *Cancer* **77**: 474–482

503 Altucci L & Gronemeyer H (2001) The promise of retinoids to fight against cancer.  
504 *Nat. Rev. Cancer* **1**: 181–193

- 505 Asturias FJ, Chadick JZ, Cheung IK, Stark H, Witkowski A, Joshi AK & Smith S  
506 (2005) Structure and molecular organization of mammalian fatty acid synthase. *Nat.*  
507 *Struct. Mol. Biol.* **12**: 225–232
- 508 Bagger FO, Sasivarevic D, Sohi SH, Laursen LG, Pundhir S, Sønderby CK, Winther  
509 O, Rapin N & Porse BT (2016) BloodSpot: a database of gene expression profiles  
510 and transcriptional programs for healthy and malignant haematopoiesis. *Nucleic*  
511 *Acids Res.* **44**: D917–D924
- 512 Bandyopadhyay S, Pai SK, Watabe M, Gross SC, Hirota S, Hosobe S, Tsukada T,  
513 Miura K, Saito K, Markwell SJ, Wang Y, Huggenvik J, Pauza ME, Iizumi M & Watabe  
514 K (2005) FAS expression inversely correlates with PTEN level in prostate cancer and  
515 a PI 3-kinase inhibitor synergizes with FAS siRNA to induce apoptosis. *Oncogene*  
516 **24**: 5389–5395
- 517 Ber Y, Shiloh R, Gilad Y, Degani N, Bialik S & Kimchi A (2015) DAPK2 is a novel  
518 regulator of mTORC1 activity and autophagy. *Cell Death Differ.* **22**: 465–475
- 519 Brigger D, Proikas-Cezanne T & Tschan MP (2014a) WIPI-dependent autophagy  
520 during neutrophil differentiation of NB4 acute promyelocytic leukemia cells. *Cell*  
521 *Death Dis.* **5**: e1315–e1315
- 522 Brigger D, Proikas-Cezanne T & Tschan MP (2014b) WIPI-dependent autophagy  
523 during neutrophil differentiation of NB4 acute promyelocytic leukemia cells. *Cell*  
524 *Death Dis.* **5**: e1315
- 525 Brigger D, Torbett BE, Chen J, Fey MF & Tschan MP (2013) Inhibition of GATE-16  
526 attenuates ATRA-induced neutrophil differentiation of APL cells and interferes with  
527 autophagosome formation. *Biochem. Biophys. Res. Commun.* **438**: 283–288
- 528 Britschgi A, Simon H-U, Tobler A, Fey MF & Tschan MP (2010) Epigallocatechin-3-  
529 gallate induces cell death in acute myeloid leukaemia cells and supports all-trans  
530 retinoic acid-induced neutrophil differentiation via death-associated protein kinase 2.  
531 *Br. J. Haematol.* **149**: 55–64
- 532 Bueno MJ, Jimenez-Renard V, Samino S, Capellades J, Junza A, López-Rodríguez  
533 ML, Garcia-Carceles J, Lopez-Fabuel I, Bolaños JP, Chandel NS, Yanes O, Colomer  
534 R & Quintela-Fandino M (2019) Essentiality of fatty acid synthase in the 2D to

535 anchorage-independent growth transition in transforming cells. *Nat. Commun.* **10**:  
536 5011

537 Bullinger L, Schlenk RF, Götz M, Botzenhardt U, Hofmann S, Russ AC, Babiak A,  
538 Zhang L, Schneider V, Döhner K, Schmitt M, Döhner H & Greiner J (2013) PRAME-  
539 induced inhibition of retinoic acid receptor signaling-mediated differentiation--a  
540 possible target for ATRA response in AML without t(15;17). *Clin. Cancer Res. Off. J.*  
541 *Am. Assoc. Cancer Res.* **19**: 2562–2571

542 Calvisi DF, Wang C, Ho C, Ladu S, Lee SA, Mattu S, Destefanis G, Delogu S,  
543 Zimmermann A, Ericsson J, Brozzetti S, Staniscia T, Chen X, Dombrowski F & Evert  
544 M (2011) Increased lipogenesis, induced by AKT-mTORC1-RPS6 signaling,  
545 promotes development of human hepatocellular carcinoma. *Gastroenterology* **140**:  
546 1071–1083

547 Dengjel J, Høyer-Hansen M, Nielsen MO, Eisenberg T, Harder LM, Schandorff S,  
548 Farkas T, Kirkegaard T, Becker AC, Schroeder S, Vanselow K, Lundberg E, Nielsen  
549 MM, Kristensen AR, Akimov V, Bunkenborg J, Madeo F, Jäättelä M & Andersen JS  
550 (2012) Identification of Autophagosome-associated Proteins and Regulators by  
551 Quantitative Proteomic Analysis and Genetic Screens. *Mol. Cell. Proteomics MCP*  
552 **11**: Available at: <https://www.ncbi.nlm.nih.gov/pmc/articles/PMC3316729/> [Accessed  
553 January 14, 2020]

554 Diakiw SM, Kok CH, To LB, Lewis ID, Brown AL & D'Andrea RJ (2012) The  
555 granulocyte-associated transcription factor Krüppel-like factor 5 is silenced by  
556 hypermethylation in acute myeloid leukemia. *Leuk. Res.* **36**: 110–116

557 Diaz-Blanco E, Bruns I, Neumann F, Fischer JC, Graef T, Roskopf M, Brors B,  
558 Pechtel S, Bork S, Koch A, Baer A, Rohr U-P, Kobbe G, von Haeseler A, Gattermann  
559 N, Haas R & Kronenwett R (2007) Molecular signature of CD34(+) hematopoietic  
560 stem and progenitor cells of patients with CML in chronic phase. *Leukemia* **21**: 494–  
561 504

562 Feng Y, He D, Yao Z & Klionsky DJ (2014) The machinery of macroautophagy. *Cell*  
563 *Res.* **24**: 24–41



- 564 Germain P, Chambon P, Eichele G, Evans RM, Lazar MA, Leid M, De Lera AR,  
565 Lotan R, Mangelsdorf DJ & Gronemeyer H (2006) International Union of  
566 Pharmacology. LX. Retinoic acid receptors. *Pharmacol. Rev.* **58**: 712–725
- 567 Ghosh J & Kapur R (2016) Regulation of Hematopoietic Stem Cell Self-Renewal and  
568 Leukemia Maintenance by the PI3K-mTORC1 Pathway. *Curr. Stem Cell Rep.* **2**:  
569 368–378
- 570 Goldman M, Craft B, Hastie M, Repečka K, McDade F, Kamath A, Banerjee A, Luo  
571 Y, Rogers D, Brooks AN, Zhu J & Haussler D (2019) The UCSC Xena platform for  
572 public and private cancer genomics data visualization and interpretation. *bioRxiv*:  
573 326470
- 574 Gump JM & Thorburn A (2014) Sorting cells for basal and induced autophagic flux by  
575 quantitative ratiometric flow cytometry. *Autophagy* **10**: 1327–1334
- 576 Han Jung-Kyu, Lee Hyun-Sook, Yang Han-Mo, Hur Jin, Jun Soo-In, Kim Ju-Young,  
577 Cho Chung-Hyun, Koh Gou-Young, Peters Jeffrey M., Park Kyung-Woo, Cho Hyun-  
578 Jai, Lee Hae-Young, Kang Hyun-Jae, Oh Byung-Hee, Park Young-Bae & Kim Hyo-  
579 Soo (2008) Peroxisome Proliferator-Activated Receptor- $\delta$  Agonist Enhances  
580 Vasculogenesis by Regulating Endothelial Progenitor Cells Through Genomic and  
581 Nongenomic Activations of the Phosphatidylinositol 3-Kinase/Akt Pathway.  
582 *Circulation* **118**: 1021–1033
- 583 Hoshii T, Tadokoro Y, Naka K, Ooshio T, Muraguchi T, Sugiyama N, Soga T, Araki K,  
584 Yamamura K & Hirao A (2012) mTORC1 is essential for leukemia propagation but  
585 not stem cell self-renewal. *J. Clin. Invest.* **122**: 2114–2129
- 586 Hu J, Che L, Li L, Pilo MG, Cigliano A, Ribback S, Li X, Latte G, Mela M, Evert M,  
587 Dombrowski F, Zheng G, Chen X & Calvisi DF (2016) Co-activation of AKT and c-  
588 Met triggers rapid hepatocellular carcinoma development via the mTORC1/FASN  
589 pathway in mice. *Sci. Rep.* **6**: 20484
- 590 Humbert M, Federzoni EA & Tschan MP (2017) Distinct TP73-DAPK2-ATG5 pathway  
591 involvement in ATO-mediated cell death versus ATRA-mediated autophagy  
592 responses in APL. *J. Leukoc. Biol.* **102**: 1357–1370

- 593 Humbert M, Halter V, Shan D, Laedrach J, Leibundgut EO, Baerlocher GM, Tobler A,  
594 Fey MF & Tschan MP (2011) Deregulated expression of Kruppel-like factors in acute  
595 myeloid leukemia. *Leuk. Res.* **35**: 909–913
- 596 Isakson P, Bjørås M, Bøe SO & Simonsen A (2010) Autophagy contributes to  
597 therapy-induced degradation of the PML/RARA oncoprotein. *Blood* **116**: 2324–2331
- 598 Jin J, Britschgi A, Schläfli AM, Humbert M, Shan-Krauer D, Batliner J, Federzoni EA,  
599 Ernst M, Torbett BE, Yousefi S, Simon H-U & Tschan MP (2018) Low Autophagy  
600 (ATG) Gene Expression Is Associated with an Immature AML Blast Cell Phenotype  
601 and Can Be Restored during AML Differentiation Therapy. *Oxid. Med. Cell. Longev.*  
602 **2018**: 1482795
- 603 Joo JH, Dorsey FC, Joshi A, Hennessy-Walters KM, Rose KL, McCastlain K, Zhang  
604 J, Iyengar R, Jung CH, Suen D-F, Steeves MA, Yang C-Y, Prater SM, Kim D-H,  
605 Thompson CB, Youle RJ, Ney PA, Cleveland JL & Kundu M (2011) Hsp90-Cdc37  
606 Chaperone Complex Regulates Ulk1- and Atg13-Mediated Mitophagy. *Mol. Cell* **43**:  
607 572–585
- 608 Kada N, Suzuki T, Aizawa K, Munemasa Y, Matsumura T, Sawaki D & Nagai R  
609 (2008) Acyclic retinoid inhibits functional interaction of transcription factors Krüppel-  
610 like factor 5 and retinoic acid receptor- $\alpha$ . *FEBS Lett.* **582**: 1755–1760
- 611 Kang K, Reilly SM, Karabacak V, Gangl MR, Fitzgerald K, Hatano B & Lee C-H  
612 (2008) Adipocyte-Derived Th2 Cytokines and Myeloid PPAR $\delta$  Regulate Macrophage  
613 Polarization and Insulin Sensitivity. *Cell Metab.* **7**: 485–495
- 614 Kim J, Kundu M, Viollet B & Guan K-L (2011) AMPK and mTOR regulate autophagy  
615 through direct phosphorylation of Ulk1. *Nat. Cell Biol.* **13**: 132–141
- 616 Klionsky DJ, Abdelmohsen K, Abe A, Abedin MJ, Abeliovich H, Acevedo Arozena A,  
617 Adachi H, Adams CM, Adams PD, Adeli K, Adhietty PJ, Adler SG, Agam G, Agarwal  
618 R, Aghi MK, Agnello M, Agostinis P, Aguilar PV, Aguirre-Ghiso J, Airoidi EM, et al  
619 (2016) Guidelines for the use and interpretation of assays for monitoring autophagy  
620 (3rd edition). *Autophagy* **12**: 1–222
- 621 Larrue C, Saland E, Boutzen H, Vergez F, David M, Joffre C, Hospital M-A,  
622 Tamburini J, Delabesse E, Manenti S, Sarry JE & Récher C (2016) Proteasome

- 623 inhibitors induce FLT3-ITD degradation through autophagy in AML cells. *Blood* **127**:  
624 882–892
- 625 Lee C-H, Chawla A, Urbiztondo N, Liao D, Boisvert WA & Evans RM (2003)  
626 Transcriptional Repression of Atherogenic Inflammation: Modulation by PPAR $\delta$ .  
627 *Science* **302**: 453–457
- 628 Li C, Yan H, Yin J, Ma J, Liao A, Yang S, Wang L, Huang Y, Lin C, Dong Z, Yang B,  
629 Cao T, Liu G & Wang L (2019) MicroRNA-21 promotes proliferation in acute myeloid  
630 leukemia by targeting Krüppel-like factor 5. *Oncol. Lett.* **18**: 3367–3372
- 631 Lung HL, Ip WK, Wong CK, Mak NK, Chen ZY & Leung KN (2002) Anti-proliferative  
632 and differentiation-inducing activities of the green tea catechin epigallocatechin-3-  
633 gallate (EGCG) on the human eosinophilic leukemia EoL-1 cell line. *Life Sci.* **72**:  
634 257–268
- 635 Lv X-R, Zheng B, Li S-Y, Han A-L, Wang C, Shi J-H, Zhang X-H, Liu Y, Li Y-H & Wen  
636 J-K (2013) Synthetic retinoid Am80 up-regulates apelin expression by promoting  
637 interaction of RAR $\alpha$  with KLF5 and Sp1 in vascular smooth muscle cells. *Biochem. J.*  
638 **456**: 35–46
- 639 Maier T, Jenni S & Ban N (2006) Architecture of mammalian fatty acid synthase at  
640 4.5 Å resolution. *Science* **311**: 1258–1262
- 641 Maningat PD, Sen P, Rijnkels M, Sunehag AL, Hadsell DL, Bray M & Haymond MW  
642 (2009) Gene expression in the human mammary epithelium during lactation: the milk  
643 fat globule transcriptome. *Physiol. Genomics* **37**: 12–22
- 644 Marchwicka A, Cebrat M, Sampath P, Śnieżewski Ł & Marcinkowska E (2014)  
645 Perspectives of Differentiation Therapies of Acute Myeloid Leukemia: The Search for  
646 the Molecular Basis of Patients' Variable Responses to 1,25-Dihydroxyvitamin D and  
647 Vitamin D Analogs. *Front. Oncol.* **4**: Available at:  
648 <http://www.ncbi.nlm.nih.gov/pmc/articles/PMC4034350/> [Accessed February 1, 2016]
- 649 Mirabilii S, Ricciardi MR, Piedimonte M, Gianfelici V, Bianchi MP & Tafuri A (2018)  
650 Biological Aspects of mTOR in Leukemia. *Int. J. Mol. Sci.* **19**: Available at:  
651 <https://www.ncbi.nlm.nih.gov/pmc/articles/PMC6121663/> [Accessed August 30, 2019]

- 652 Moradzadeh M, Roustazadeh A, Tabarraei A, Erfanian S & Sahebkar A (2018)  
653 Epigallocatechin-3-gallate enhances differentiation of acute promyelocytic leukemia  
654 cells via inhibition of PML-RAR $\alpha$  and HDAC1. *Phytother. Res. PTR* **32**: 471–479
- 655 Napolitano G, Esposito A, Choi H, Matarese M, Benedetti V, Malta CD, Monfregola J,  
656 Medina DL, Lippincott-Schwartz J & Ballabio A (2018) mTOR-dependent  
657 phosphorylation controls TFEB nuclear export. *Nat. Commun.* **9**: 3312
- 658 Odegaard JI, Ricardo-Gonzalez RR, Red Eagle A, Vats D, Morel CR, Goforth MH,  
659 Subramanian V, Mukundan L, Ferrante AW & Chawla A (2008) Alternative M2  
660 Activation of Kupffer Cells by PPAR $\delta$  Ameliorates Obesity-Induced Insulin  
661 Resistance. *Cell Metab.* **7**: 496–507
- 662 Orfali N, O'Donovan TR, Cahill MR, Benjamin D, Nanus DM, McKenna SL, Gudas LJ  
663 & Mongan NP (2019) All-trans retinoic acid (ATRA) induced TFEB expression is  
664 required for myeloid differentiation in acute promyelocytic leukemia (APL). *Eur. J.*  
665 *Haematol.*
- 666 Orfali N, O'Donovan TR, Nyhan MJ, Britschgi A, Tschan MP, Cahill MR, Mongan NP,  
667 Gudas LJ & McKenna SL (2015) Induction of autophagy is a key component of all-  
668 trans-retinoic acid-induced differentiation in leukemia cells and a potential target for  
669 pharmacologic modulation. *Exp. Hematol.* **43**: 781-793.e2
- 670 Park J, Lee SE, Hur J, Hong EB, Choi J-I, Yang J-M, Kim J-Y, Kim Y-C, Cho H-J,  
671 Peters JM, Ryoo S-B, Kim YT & Kim H-S (2015) M-CSF from Cancer Cells Induces  
672 Fatty Acid Synthase and PPAR $\beta/\delta$  Activation in Tumor Myeloid Cells, Leading to  
673 Tumor Progression. *Cell Rep.* **10**: 1614–1625
- 674 Peña-Llopis S, Vega-Rubin-de-Celis S, Schwartz JC, Wolff NC, Tran TAT, Zou L, Xie  
675 X-J, Corey DR & Brugarolas J (2011) Regulation of TFEB and V-ATPases by  
676 mTORC1. *EMBO J.* **30**: 3242–3258
- 677 Peters JM & Gonzalez FJ (2009) Sorting out the functional role(s) of peroxisome  
678 proliferator-activated receptor- $\beta/\delta$  (PPAR $\beta/\delta$ ) in cell proliferation and cancer.  
679 *Biochim. Biophys. Acta BBA - Rev. Cancer* **1796**: 230–241

- 680 Petherick KJ, Conway OJL, Mpamhanga C, Osborne SA, Kamal A, Saxty B & Ganley  
681 IG (2015) Pharmacological Inhibition of ULK1 Kinase Blocks Mammalian Target of  
682 Rapamycin (mTOR)-dependent Autophagy. *J. Biol. Chem.* **290**: 11376–11383
- 683 Petrie K, Zelent A & Waxman S (2009) Differentiation therapy of acute myeloid  
684 leukemia: past, present and future. *Curr. Opin. Hematol.* **16**: 84–91
- 685 Pizer ES, Kurman RJ, Pasternack GR & Kuhajda FP (1997) Expression of fatty acid  
686 synthase is closely linked to proliferation and stromal decidualization in cycling  
687 endometrium. *Int. J. Gynecol. Pathol. Off. J. Int. Soc. Gynecol. Pathol.* **16**: 45–51
- 688 Pizer ES, Lax SF, Kuhajda FP, Pasternack GR & Kurman RJ (1998) Fatty acid  
689 synthase expression in endometrial carcinoma. *Cancer* **83**: 528–537
- 690 Poole B & Ohkuma S (1981) Effect of weak bases on the intralysosomal pH in mouse  
691 peritoneal macrophages. *J. Cell Biol.* **90**: 665–669
- 692 Rashid A, Pizer ES, Moga M, Milgraum LZ, Zahurak M, Pasternack GR, Kuhajda FP  
693 & Hamilton SR (1997) Elevated expression of fatty acid synthase and fatty acid  
694 synthetic activity in colorectal neoplasia. *Am. J. Pathol.* **150**: 201–208
- 695 Rice AM, Holtz KM, Karp J, Rollins S & Sartorelli AC (2004) Analysis of the  
696 relationship between Scl transcription factor complex protein expression patterns and  
697 the effects of LiCl on ATRA-induced differentiation in blast cells from patients with  
698 acute myeloid leukemia. *Leuk. Res.* **28**: 1227–1237
- 699 Rizzi M, Tschan MP, Britschgi C, Britschgi A, Hügli B, Grob TJ, Leupin N, Mueller  
700 BU, Simon H-U, Ziemiecki A, Torbett BE, Fey MF & Tobler A (2007) The death-  
701 associated protein kinase 2 is up-regulated during normal myeloid differentiation and  
702 enhances neutrophil maturation in myeloid leukemic cells. *J. Leukoc. Biol.* **81**: 1599–  
703 1608
- 704 Rocznik-Ferguson A, Petit CS, Froehlich F, Qian S, Ky J, Angarola B, Walther TC &  
705 Ferguson SM (2012) The transcription factor TFEB links mTORC1 signaling to  
706 transcriptional control of lysosome homeostasis. *Sci. Signal.* **5**: ra42

- 707 Roder K & Schweizer M (2007) Retinoic acid-mediated transcription and maturation  
708 of SREBP-1c regulates fatty acid synthase via cis-elements responsible for nutritional  
709 regulation. *Biochem. Soc. Trans.* **35**: 1211–1214
- 710 Roder K, Wolf SS & Schweizer M (1996) Regulation of the fatty acid synthase  
711 promoter by retinoic acid. *Biochem. Soc. Trans.* **24**: 233S
- 712 Rudat S, Pfau A, Cheng YY, Holtmann J, Ellegast JM, Bühler C, Marcantonio DD,  
713 Martinez E, Göllner S, Wickenhauser C, Müller-Tidow C, Lutz C, Bullinger L, Milsom  
714 MD, Sykes SM, Fröhling S & Scholl C (2018) RET-mediated autophagy suppression  
715 as targetable co-dependence in acute myeloid leukemia. *Leukemia* **32**: 2189–2202
- 716 Schenk T, Chen WC, Göllner S, Howell L, Jin L, Hebestreit K, Klein H-U, Popescu  
717 AC, Burnett A, Mills K, Casero RA, Marton L, Woster P, Minden MD, Dugas M, Wang  
718 JCY, Dick JE, Müller-Tidow C, Petrie K & Zelent A (2012) Inhibition of the LSD1  
719 (KDM1A) demethylase reactivates the all-trans-retinoic acid differentiation pathway in  
720 acute myeloid leukemia. *Nat. Med.* **18**: 605–611
- 721 Shahrin NH, Diakiw S, Dent LA, Brown AL & D'Andrea RJ (2016) Conditional  
722 knockout mice demonstrate function of Klf5 as a myeloid transcription factor. *Blood*  
723 **128**: 55–59
- 724 Shurbaji MS, Kalbfleisch JH & Thurmond TS (1996) Immunohistochemical detection  
725 of a fatty acid synthase (OA-519) as a predictor of progression of prostate cancer.  
726 *Hum. Pathol.* **27**: 917–921
- 727 Su M, Alonso S, Jones JW, Yu J, Kane MA, Jones RJ & Ghiaur G (2015) All-Trans  
728 Retinoic Acid Activity in Acute Myeloid Leukemia: Role of Cytochrome P450 Enzyme  
729 Expression by the Microenvironment. *PLOS ONE* **10**: e0127790
- 730 Suzuki K, Nakamura S, Morimoto M, Fujii K, Noda NN, Inagaki F & Ohsumi Y (2014)  
731 Proteomic Profiling of Autophagosome Cargo in *Saccharomyces cerevisiae*. *PLOS*  
732 *ONE* **9**: e91651
- 733 Tabe Y, Tafuri A, Sekihara K, Yang H & Konopleva M (2017) Inhibition of mTOR  
734 kinase as a therapeutic target for acute myeloid leukemia. *Expert Opin. Ther. Targets*  
735 **21**: 705–714

- 736 Thomé MP, Filippi-Chiela EC, Villodre ES, Migliavaca CB, Onzi GR, Felipe KB &  
737 Lenz G (2016) Ratiometric analysis of Acridine Orange staining in the study of acidic  
738 organelles and autophagy. *J. Cell Sci.* **129**: 4622–4632
- 739 Tschan MP, Fischer KM, Fung VS, Pirnia F, Borner MM, Fey MF, Tobler A & Torbett  
740 BE (2003) Alternative splicing of the human cyclin D-binding Myb-like protein  
741 (hDMP1) yields a truncated protein isoform that alters macrophage differentiation  
742 patterns. *J. Biol. Chem.* **278**: 42750–42760
- 743 Vega-Rubin-de-Celis S, Peña-Llopis S, Konda M & Brugarolas J (2017) Multistep  
744 regulation of TFEB by MTORC1. *Autophagy* **13**: 464–472
- 745 Visca P, Sebastiani V, Botti C, Diodoro MG, Lasagni RP, Romagnoli F, Brenna A, De  
746 Joannon BC, Donnorso RP, Lombardi G & Alo PL (2004) Fatty acid synthase (FAS)  
747 is a marker of increased risk of recurrence in lung carcinoma. *Anticancer Res.* **24**:  
748 4169–4173
- 749 Volpe JJ & Vagelos PR (1976) Mechanisms and regulation of biosynthesis of  
750 saturated fatty acids. *Physiol. Rev.* **56**: 339–417
- 751 Wang Z, Cao L, Kang R, Yang M, Liu L, Zhao Y, Yu Y, Xie M, Yin X, Livesey KM &  
752 Tang D (2011) Autophagy regulates myeloid cell differentiation by p62/SQSTM1-  
753 mediated degradation of PML-RAR $\alpha$  oncoprotein. *Autophagy* **7**: 401–411
- 754 Wang Z-Y & Chen Z (2008) Acute promyelocytic leukemia: from highly fatal to highly  
755 curable. *Blood* **111**: 2505–2515
- 756 Watson AS, Riffelmacher T, Stranks A, Williams O, De Boer J, Cain K, MacFarlane  
757 M, McGouran J, Kessler B, Khandwala S, Chowdhury O, Puleston D, Phadwal K,  
758 Mortensen M, Ferguson D, Soilleux E, Woll P, Jacobsen SEW & Simon AK (2015)  
759 Autophagy limits proliferation and glycolytic metabolism in acute myeloid leukemia.  
760 *Cell Death Discov.* **1**:
- 761 Weiss L, Hoffmann GE, Schreiber R, Andres H, Fuchs E, Körber E & Kolb HJ (1986)  
762 Fatty-acid biosynthesis in man, a pathway of minor importance. Purification, optimal  
763 assay conditions, and organ distribution of fatty-acid synthase. *Biol. Chem. Hoppe-  
764 Seyler* **367**: 905–912

765 Yamamoto A, Tagawa Y, Yoshimori T, Moriyama Y, Masaki R & Tashiro Y (1998)  
766 Bafilomycin A1 prevents maturation of autophagic vacuoles by inhibiting fusion  
767 between autophagosomes and lysosomes in rat hepatoma cell line, H-4-II-E cells.  
768 *Cell Struct. Funct.* **23**: 33–42

769 Yeh CW, Chen WJ, Chiang CT, Lin-Shiau SY & Lin JK (2003) Suppression of fatty  
770 acid synthase in MCF-7 breast cancer cells by tea and tea polyphenols: a possible  
771 mechanism for their hypolipidemic effects. *Pharmacogenomics J.* **3**: 267

772 Zuo X, Peng Z, Moussalli MJ, Morris JS, Broaddus RR, Fischer SM & Shureiqi I  
773 (2009) Targeted Genetic Disruption of Peroxisome Proliferator–Activated Receptor- $\delta$   
774 and Colonic Tumorigenesis. *JNCI J. Natl. Cancer Inst.* **101**: 762–767

775

776



777 **Figure Legends**

778 **Figure 1: Increased FASN expression is associated with an immature AML**  
779 **blast phenotype.**

780 A. FASN mRNA levels in AML blasts, CD34<sup>+</sup> progenitor cells and granulocytes from  
781 healthy donors were quantified by qPCR. All the samples were obtained from the  
782 Inselspital, Bern, Switzerland. AML patient cells and granulocytes were isolated using  
783 Ficoll gradient density centrifugation. Values are the differences in Ct-values between  
784 FASN and the housekeeping gene and ABL1. MNW \* p<0.05, \*\* p<0.0. B. Blood spot  
785 data bank analysis of FASN expression in AML blasts compared to granulocytes from  
786 healthy donors. MNW \* p<0.05, \*\* p<0.01. C. Western blot analysis of FASN  
787 regulation in NB4 and HT93 APL cells upon ATRA treatment at different time points  
788 (1, 2 and 3 days). Total protein was extracted and submitted to immunoblotting using  
789 anti-FASN antibody. Total protein is shown as loading control. The relative protein  
790 expressions were normalized to total protein and quantified using ImageJ software  
791 (NIH, Bethesda, MD, USA). Data are represented as a mean (n=3), Error bars: SD.

792 **Figure 2:** FASN is degraded via autophagy. A. NB4 cells were treated with ATRA  
793 and three concentrations of Bafilomycin A1 (BafA1) for 24h. NB4 cells were lysed  
794 and subjected to western blot analysis as described in 1C. Quantification of the  
795 bands was done using ImageJ software. Data are represented as a mean (n=3),  
796 Error bars: SD. B. NB4 cells stably expressing mCherry-LC3B were treated with  
797 ATRA and different concentrations of Bafilomycin A1 (BafA1) for 24h. NB4 mCherry-  
798 LC3B cells were fixed and stained for endogenous FASN. The colocalization analysis  
799 was performed using ImageJ software. Scale: 10µm C. NB4 cells were treated as in  
800 2C and fixed and stained for endogenous FASN and p62. The colocalization analysis  
801 was performed using ImageJ software. Scale: 10µm. Results shown are from at least

802 two biological duplicates. (C) EGCG potentiate ATRA-induced FASN degradation by  
803 autophagy. (D) FASN and p62 western blot analysis of NB4 cells treated with DMSO  
804 (right panel) or ATRA (left panel), in combination with different EGCG (5 $\mu$ M to 15 $\mu$ M)  
805 and BafA1 (100nm) concentrations for 24h. Total cell lysates were subjected to  
806 western blotting. Quantification of the western blot was done as in Figure 1C.

807 **Figure 3:** Reducing FASN protein levels improves ATRA-mediated neutrophil  
808 differentiation of APL cells. (A-D). NB4 cells were stably transduced with non-  
809 targeting shRNA (SHC002) or shRNAs targeting *FASN* (sh*FASN*\_1 and sh*FASN*\_2)  
810 lentiviral vectors and differentiated with 1 $\mu$ M ATRA for 1, 2 or 3 days. A. FASN  
811 western blot analysis of control and sh*FASN* (sh*FASN*\_1, \_2) expressing NB4 cell  
812 populations. B-C. NBT reduction in ATRA-treated NB4 control (SHC002) and *FASN*  
813 knockdown (sh*FASN*\_1, \_2) cells. B. Representative images of NBT assays in  
814 control and FASN depleted NB4 cells. C. Quantification of the percentage of NBT<sup>+</sup>  
815 cells. D. Flow cytometry analysis of CD11b surface expression NB4 control  
816 (SHC002) and *FASN* knockdown (sh*FASN*\_1, \_2) NB4 cells upon ATRA treatment.  
817 E-G. NB4 cells were treated with the indicated C75 concentrations for 3 days in  
818 combination with ATRA. E-F. NBT reduction during ATRA-mediated neutrophil  
819 differentiation of NB4 control and C75 treated cells. E. Representative images of NBT  
820 assays in control and C75 treated NB4 cells upon ATRA-mediated differentiation. F.  
821 Quantification of the percentage of NBT<sup>+</sup> cells. G. Flow cytometry analysis of CD11b  
822 surface expression in NB4 control and C75 treated cells upon ATRA-mediated  
823 differentiation. H-J. NB4 cells were treated with the indicated Orlistat concentrations  
824 for 3 days in combination with ATRA. H-I. NBT reduction during ATRA-mediated  
825 neutrophil differentiation of NB4 control and Orlistat treated cells. H. Representative  
826 images of NBT assays in control and Orlistat treated NB4 cells upon ATRA-mediated  
827 differentiation. I. Quantification of the percentage of NBT<sup>+</sup> cells. J. Flow cytometry

828 analysis of CD11b surface expression in NB4 control and Orlistat treated cells upon  
829 ATRA-mediated differentiation. Data are represented as a mean (n=3), Error bars:  
830 SD.

831 **Figure 4:** FASN expression is linked to increased mTOR activity. A-C. Autophagy  
832 induction in NB4 shFASN cells treated with 1 $\mu$ M ATRA for 24h, in the presence or  
833 absence of BafA1 during the last 2h before harvesting. A-B. NB4 control (SHC002)  
834 and FASN knockdown (shFASN\_1, \_2) cells were subjected to LC3B  
835 immunofluorescence. A. Representative picture of LC3B punctae in NB4 control  
836 (SHC002) and FASN knockdown (shFASN\_1, \_2) cells. Scale: 10 $\mu$ m B.  
837 Quantification of autophagy flux. Three independent experiments were quantified as  
838 described in (Humbert *et al*, 2017). C. Scheme of mTOR activity on the ULK1  
839 complex D. NB4 control (SHC002) and FASN knockdown (shFASN\_1, \_2) cells were  
840 treated for 1 to 3 days with ATRA. Total protein was extracted and subjected to  
841 immunoblotting using anti-FASN, anti-pmTOR(Ser2448), anti- pULK1(Ser757), anti-  
842 ULK1, anti-pATG13(Ser318) and anti-ATG13 antibodies. E-F. Relative protein  
843 expressions of two independent experiments were normalized to total protein or the  
844 respective non-phosphorylated protein and quantified using ImageJ software (NIH,  
845 Bethesda, MD, USA). E. pmTOR(Ser2448) normalized to total protein. F.  
846 pULK1(Ser757) normalized to total ULK1. G. pATG13(Ser318) normalized to total  
847 ATG13. Results shown are from at least two biological duplicates.

848 **Figure 5:** FASN expression negatively associates with TFEB activity. A. Heatmaps of  
849 the correlation between FASN and TFEB target genes extracted from the TCGA-AML  
850 cohort analyzed by the UCSD xena platform and from the bloodspot data bank  
851 (Spearman, p values in Supplementary Table1 and 2). B. mRNA sequencing data of  
852 NB4 cells treated with ATRA. Relative expression of *FASN*, *TFEB* and TFEB

853 transcriptional targets involved in lysosomal function and biogenesis are shown. C-H.  
854 NB4 control (SHC002) and *FASN* knockdown (sh*FASN*\_1, \_2) cells were treated for  
855 1 to 3 days with ATRA. (C) Immunofluorescence microscopy of endogenous TFEB  
856 (red) and  $\alpha$ -tubulin (green). IgG staining was used as negative control. Nuclei were  
857 stained with DAPI (blue). (D) Immunofluorescence microscopy of endogenous  
858 LAMP1 (red). Nuclei were stained with DAPI (blue). Scale: 10 $\mu$ m (E) LAMP1 punctae  
859 quantification of cells shown in D. Scale: 10 $\mu$ m (F-H) Acridine Orange staining. (F)  
860 Histogram representation of the ratio between RED and GREEN of NB4 control  
861 (SHC002) cells treated as described in 6C. (G) Representative histogram of NB4  
862 control (SHC002) and *FASN* knockdown (sh*FASN*\_1, \_2) cells treated as in 6C. (H)  
863 Overton percentage positive quantification of the RED/GREEN ratio of NB4 control  
864 (SHC002) and *FASN* knockdown (sh*FASN*\_1, \_2) cells treated with ATRA at  
865 indicated times. (I) Evaluation of *BECN1*, *GABARAP*, *STK4* and *WDR45* mRNA  
866 transcripts was done by qPCR. Values were normalized to the HMBS housekeeping  
867 gene. Results shown are from at least two biological duplicates.

868 **Figure 6:** EGCG treatment accelerates TFEB translocation to the nucleus and  
869 improves lysosome biogenesis. NB4 and HT93 APL cells were treated for 1 to 3 days  
870 with ATRA in combination with indicated concentrations of EGCG. Cells were then  
871 subjected to (A) Western blot analysis of *FASN* and pmTOR(Ser2448), (B) TFEB  
872 endogenous immunofluorescence. B. Representative pictures of TFEB in NB4 cells  
873 treated with ATRA and different concentrations of EGCG (5 $\mu$ M, 10 $\mu$ M and 15 $\mu$ M),  
874 Scale: 10 $\mu$ m. (C) Evaluation of *BECN1*, *GABARAP*, *STK4* and *WDR45* mRNA  
875 transcripts was done by qPCR. Values were normalized to the HMBS housekeeping  
876 gene. Results shown are from at least two biological duplicates.

877 **Figure 7:** Lowering FASN protein expression levels improves ATRA therapy in non-  
878 APL AML cells. A-F: MOLM-13 (A, C, E), and OCI-AML2 (B, D, F) cells were treated  
879 with ATRA and different concentrations of EGCG (5 $\mu$ M, 10 $\mu$ M and 15 $\mu$ M) for 3 days  
880 (n=3). (A-B) CD11b surface staining was analyzed by flow cytometry. Box blot  
881 represent the median fluorescence intensity (MFI) of CD11b positive cells. C-D.  
882 Acridine Orange staining. Analysis was performed as in Figure 6E-G. E-F. Total  
883 protein extracted from MOLM-13 and OCI-AML2 cells treated as in 7A/B were  
884 subjected to immunoblotting using anti-FASN, anti-pmTOR(Ser2448), anti-  
885 pULK1(Ser757), anti-ULK1, anti-pATG13(Ser318) and anti-ATG13 antibodies.  
886 Results shown are from at least two biological duplicates.

887 **Figure 8:** MOLM-13 and OCI/AML2 were stably transduced with 2 independent  
888 shRNA targeting *FASN* (n=3) A-B.: *FASN* knockdown efficiency was validated in  
889 MOLM-13 (A) and OCI/AML2 (B) by western blotting. C-H. MOLM-13 and OCI/AML2  
890 control and *FASN* knockdown cells were treated with ATRA for 3 days. (C-D) CD11b  
891 surface marker expression was analyzed as in A-B. (E-F) Acridine Orange staining  
892 analysis was performed as in 7E-G. (G-H) Western blot analysis of total protein was  
893 extracted and subjected to immunoblotting using anti-FASN, anti-pmTOR(Ser2448),  
894 anti- pULK1(Ser757), anti-ULK1, anti-pATG13(Ser318) and anti-ATG13 antibodies.  
895 Results shown are from at least two biological duplicates.

Figure 1

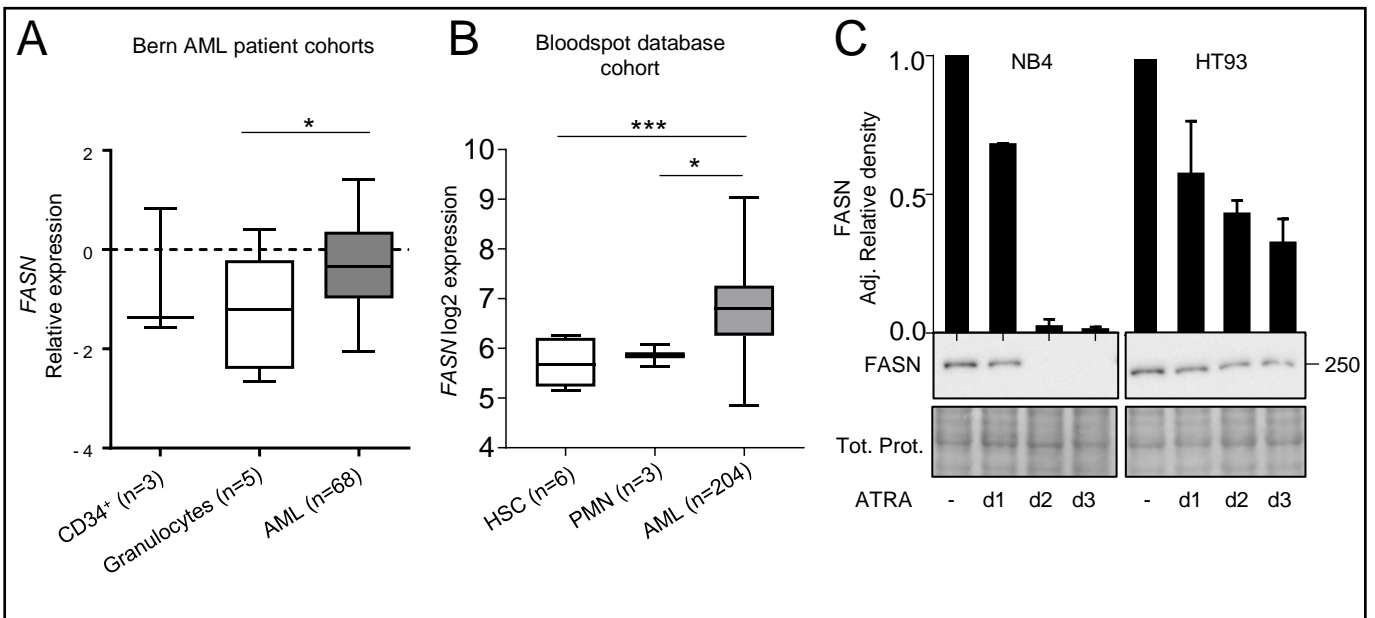

Figure 2

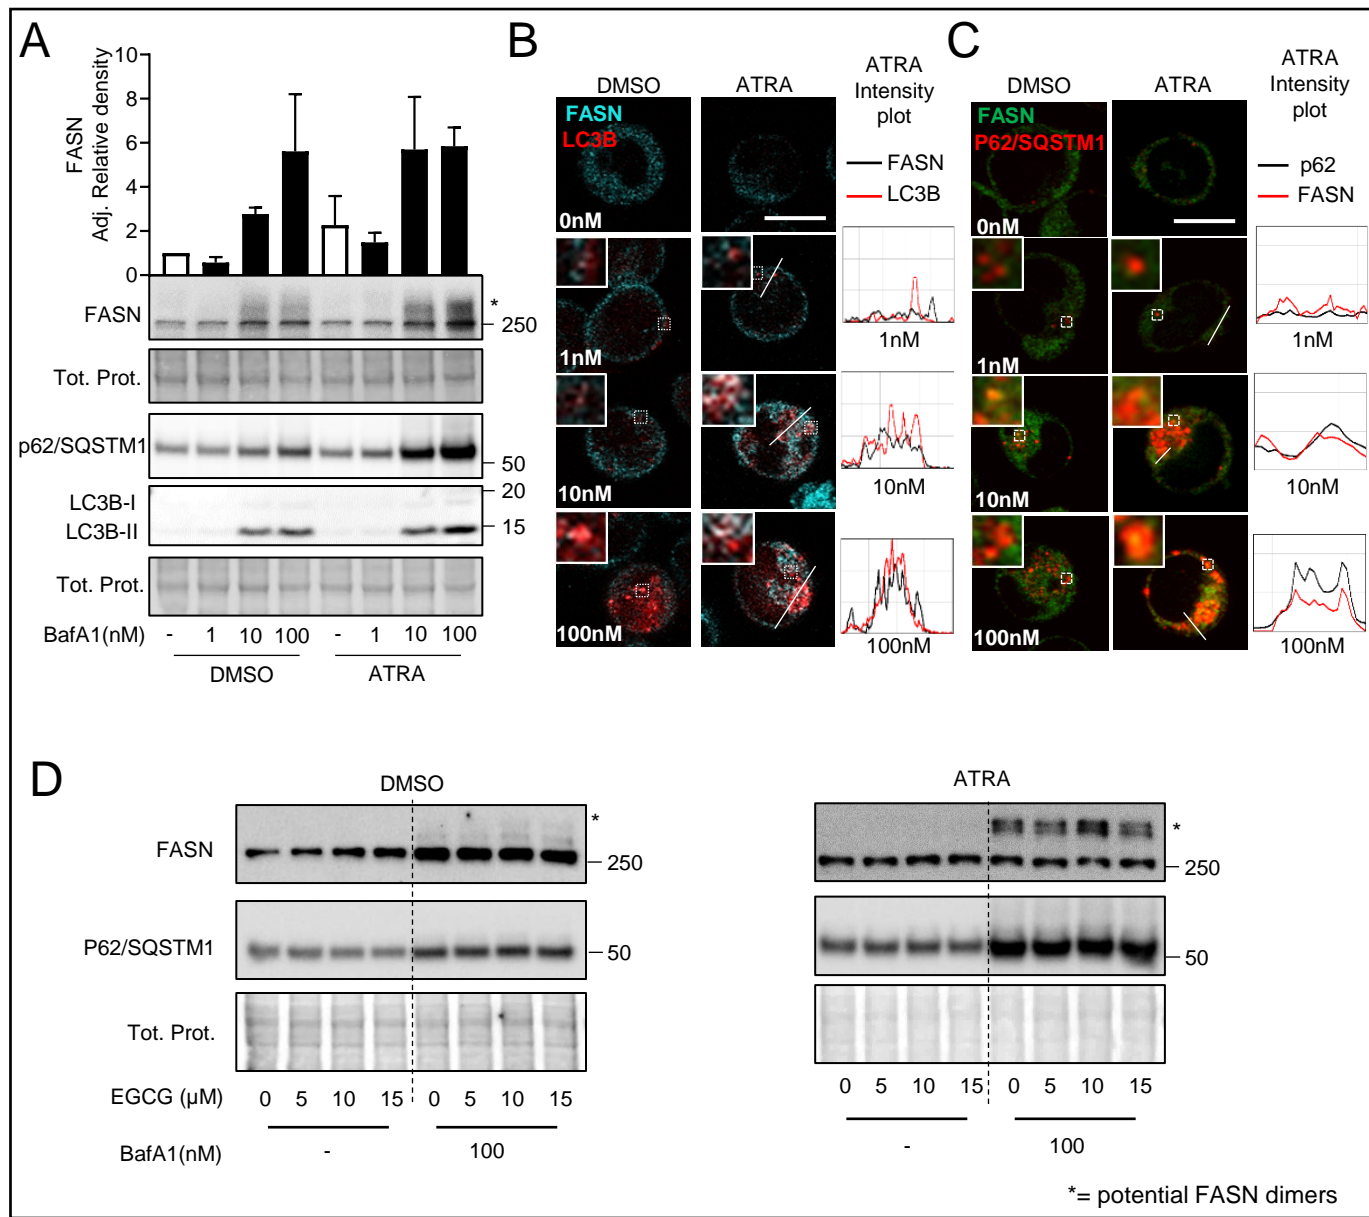

Figure 3

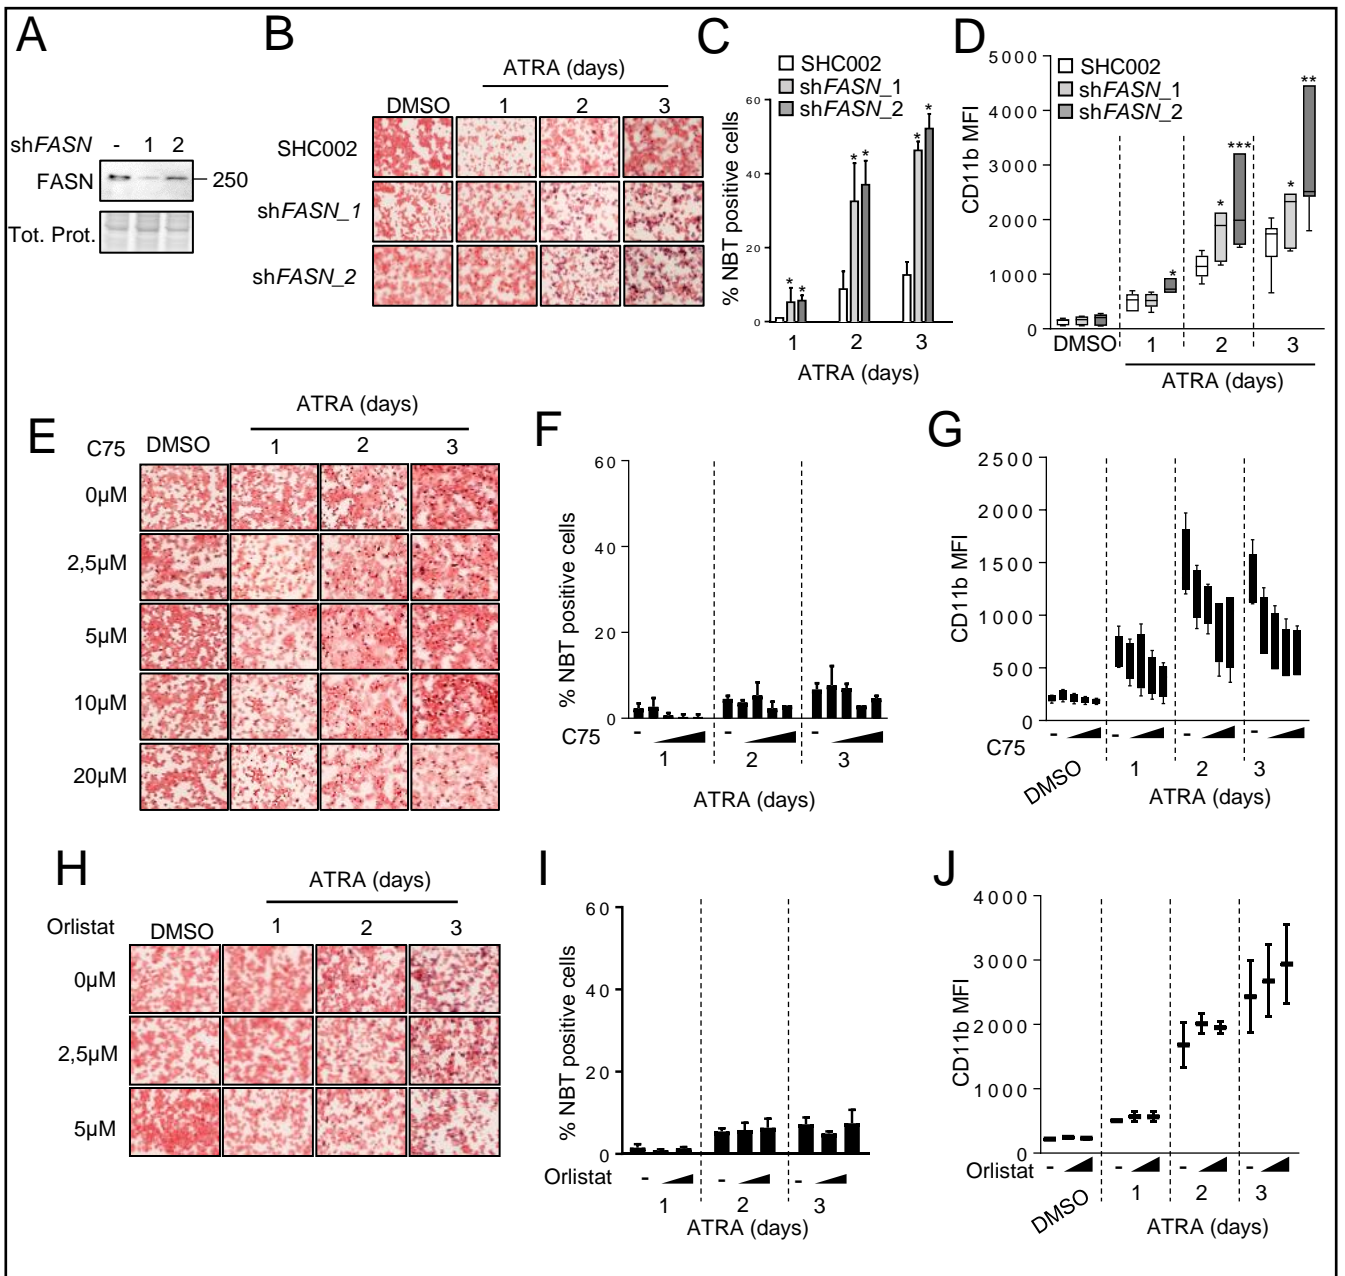



**Figure 4**

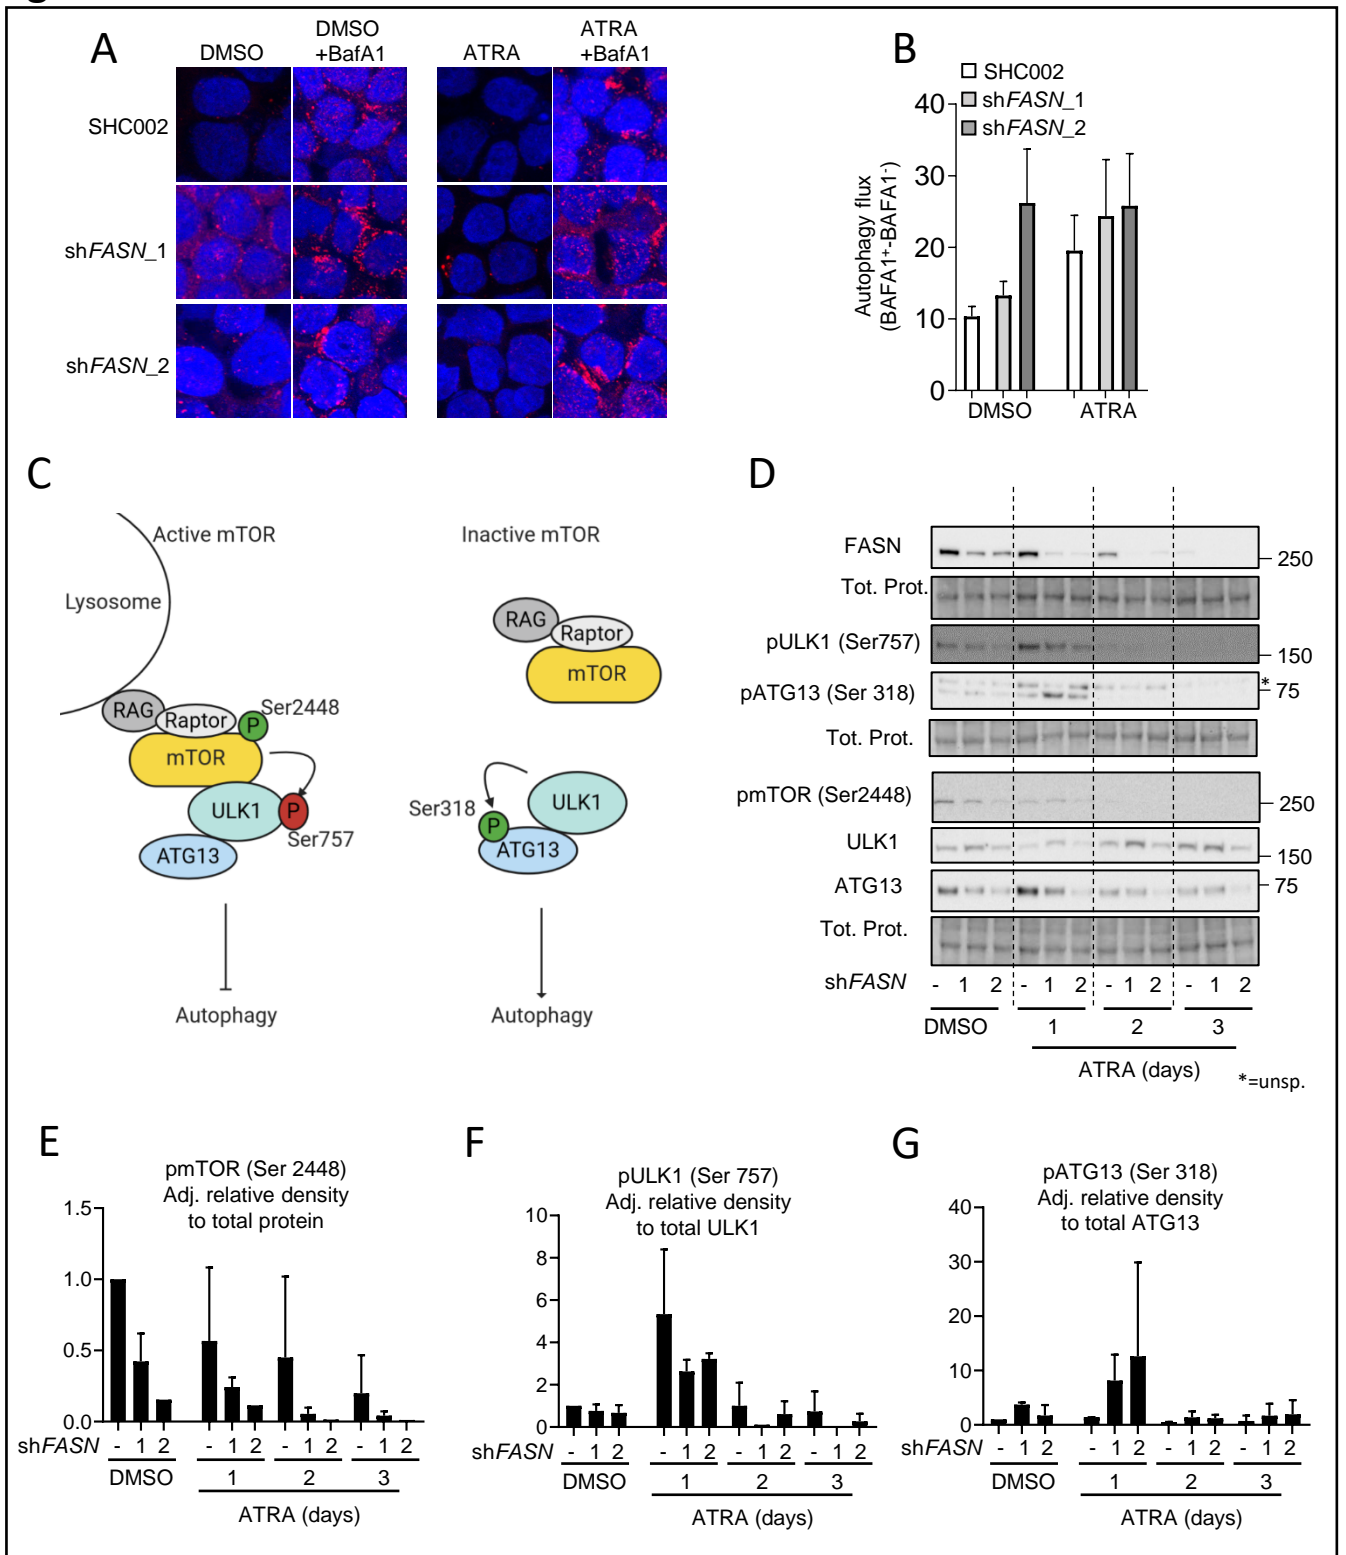

Figure 5

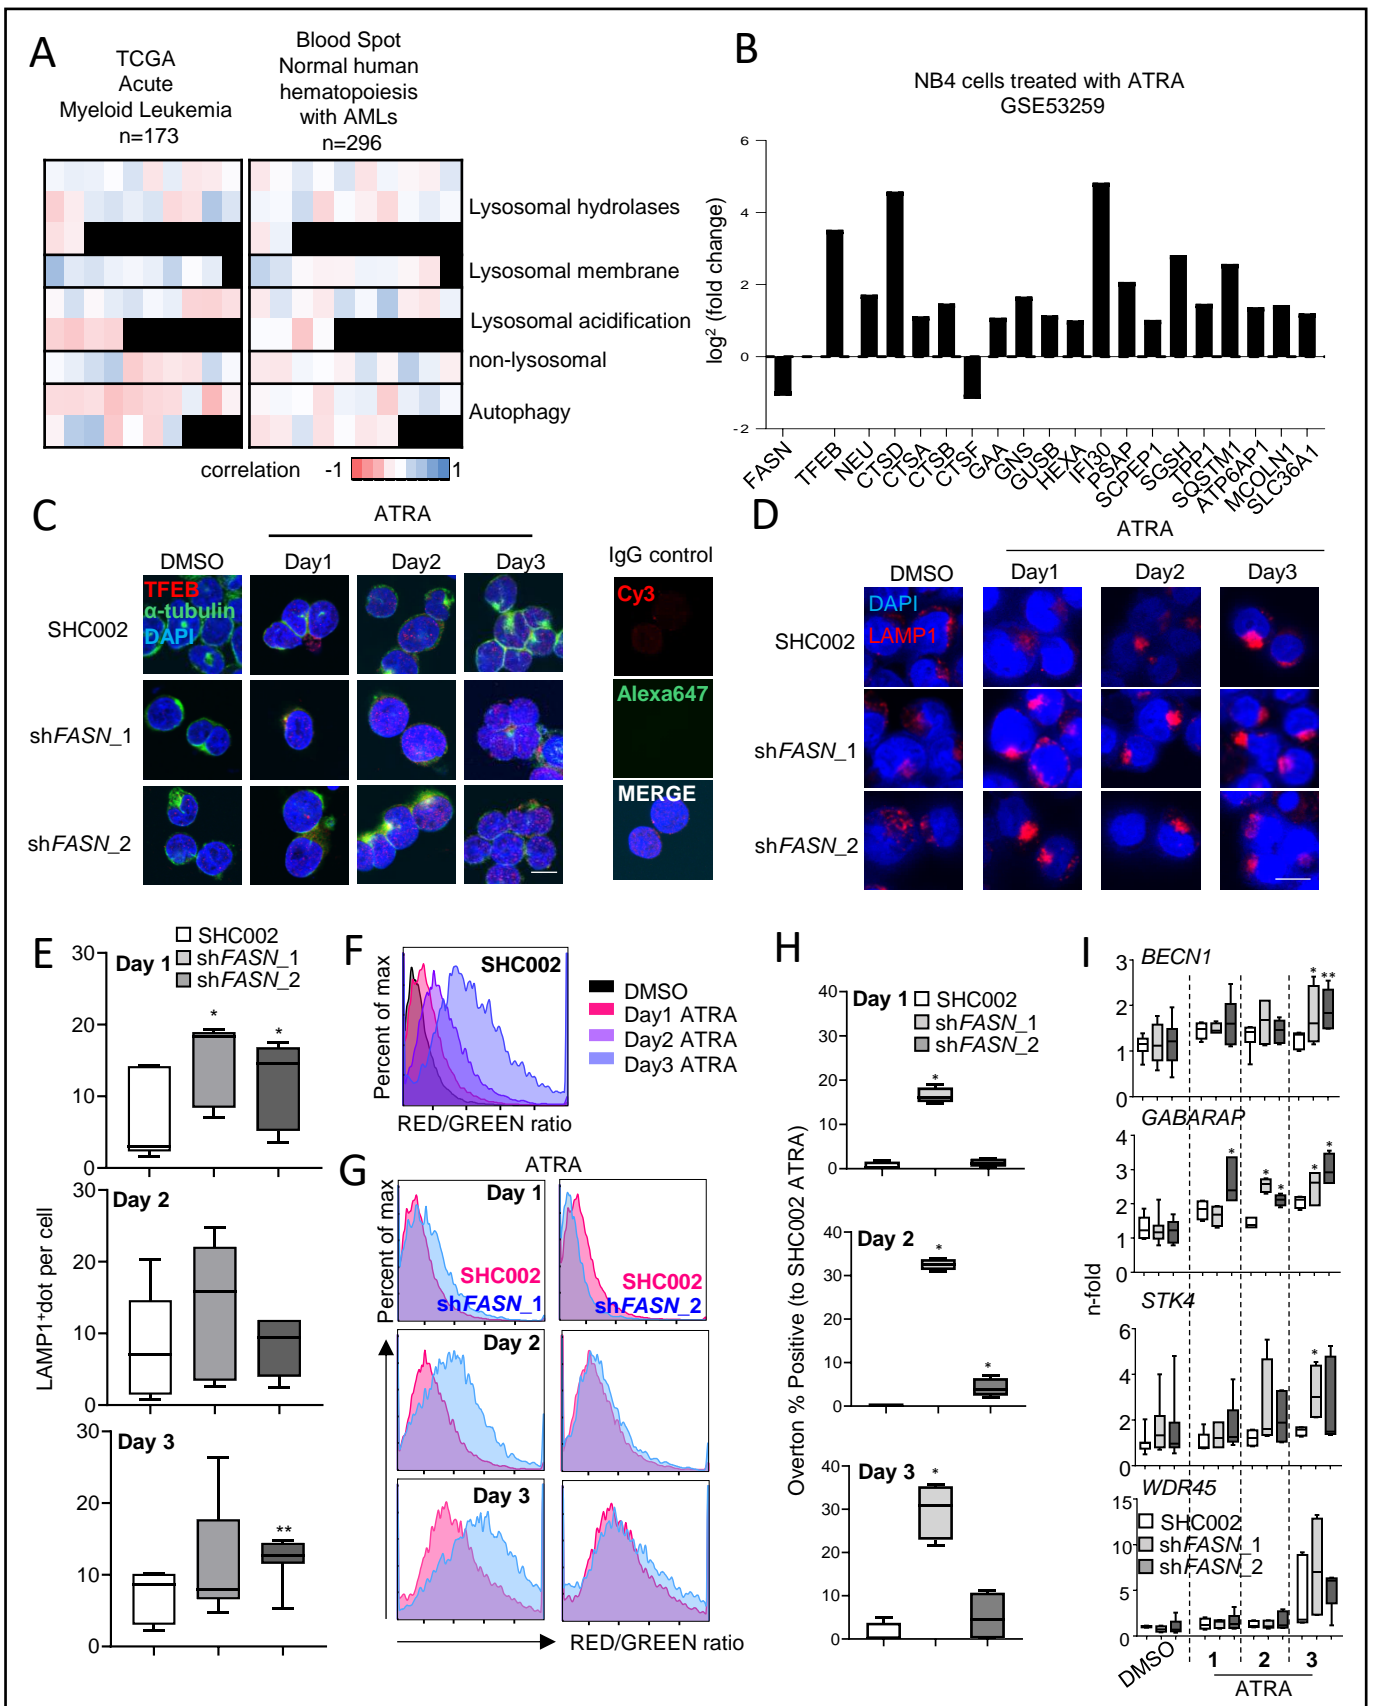

Figure 6

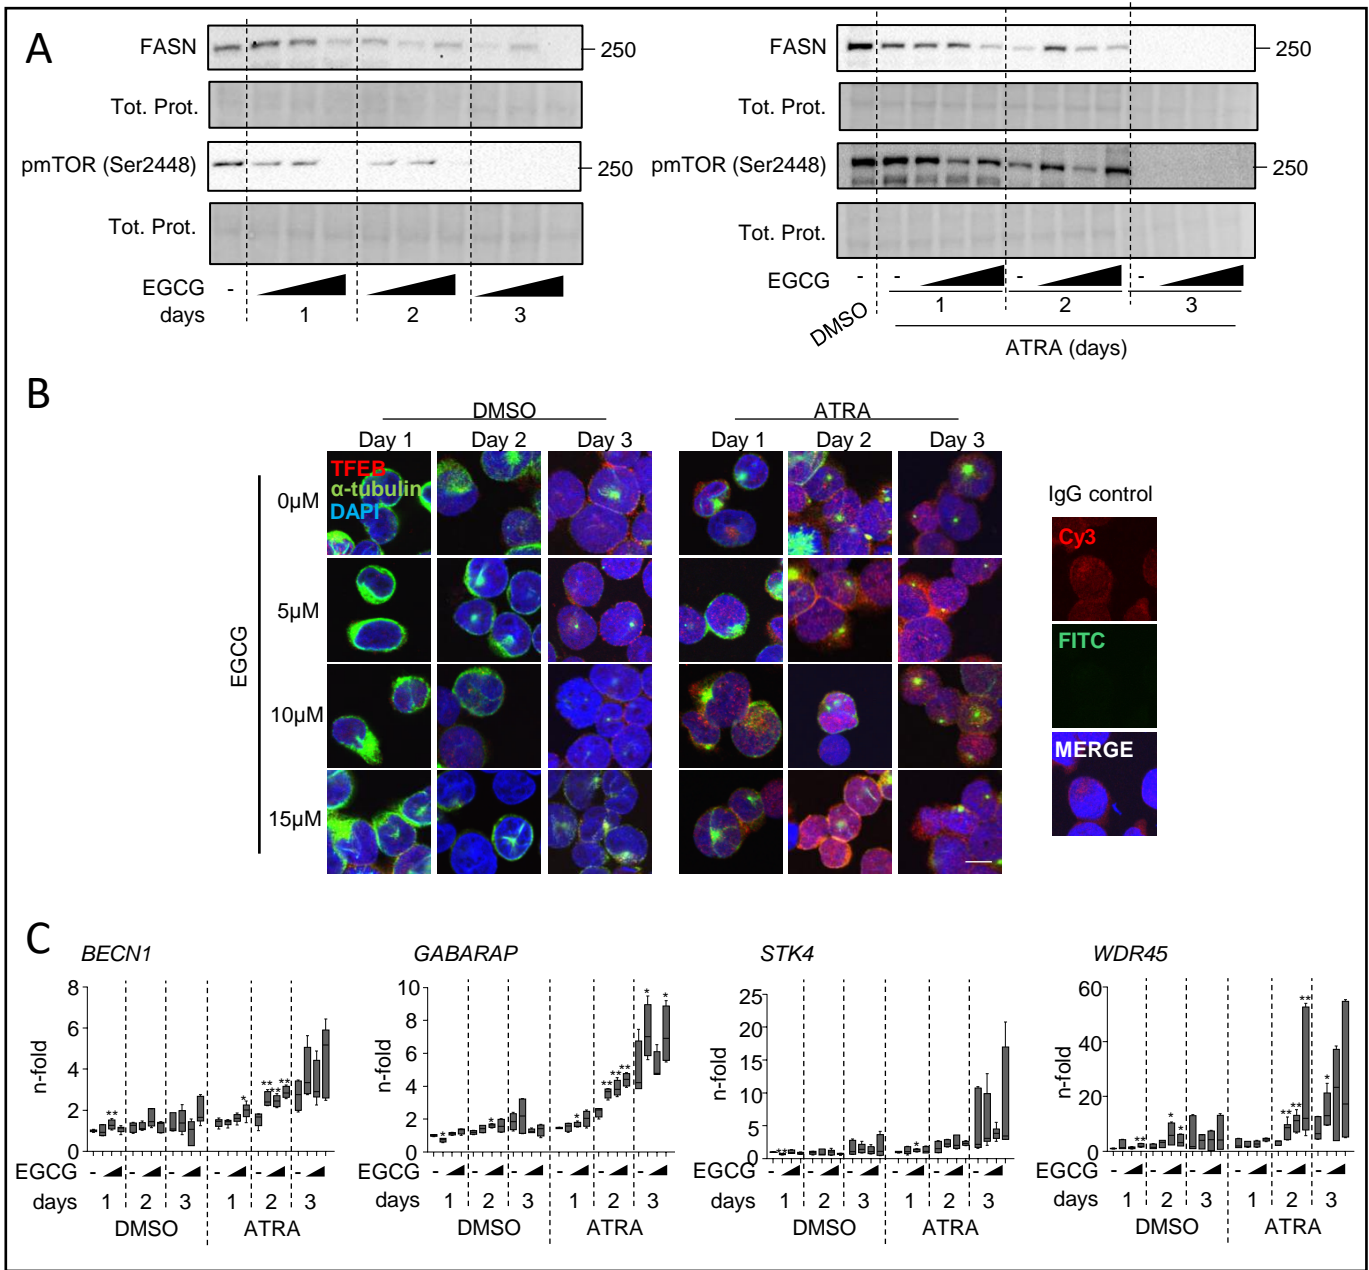

Figure 7

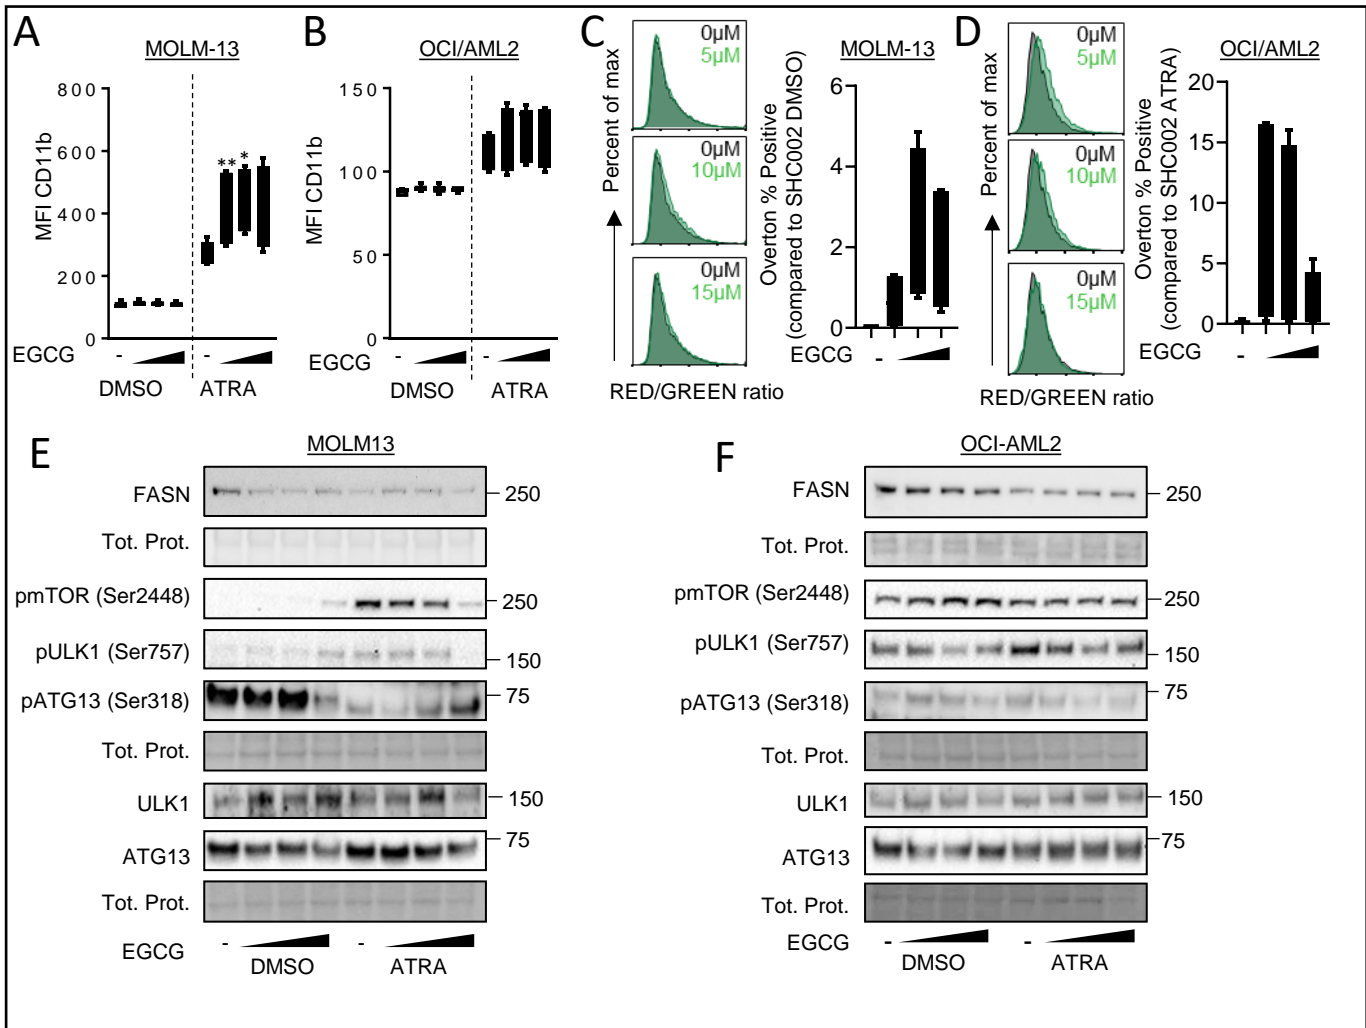

**Figure 8**

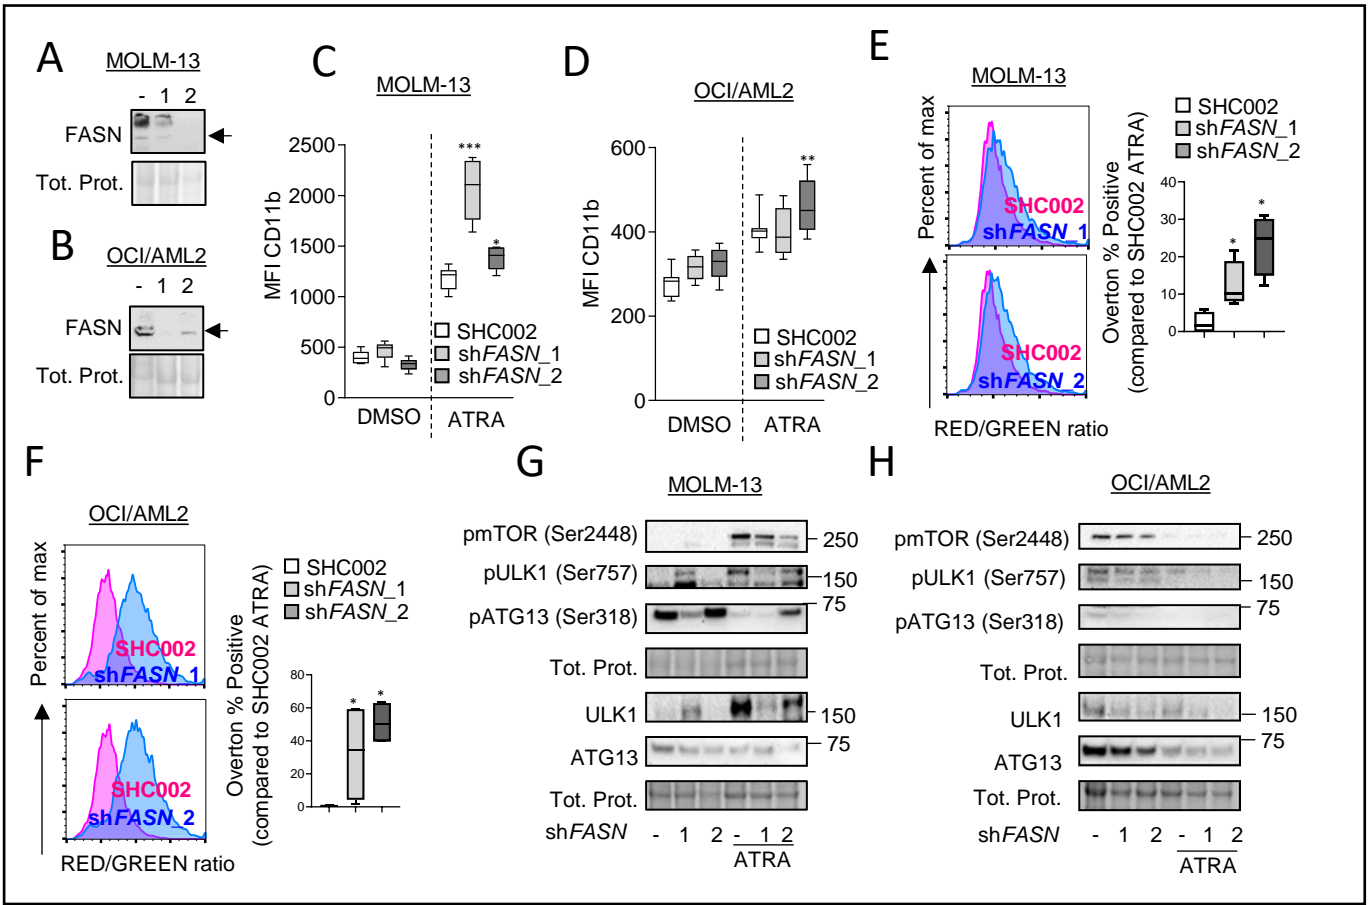

Source: https://www.biorxiv.org/content/10.1101/2020.01.29.924555v3.full.pdf
